# Supplementary material
Source: publisher figshare collection journal article supplement (https://plos.figshare.com/articles/dataset/_/5898772)
Supplement: Supplementary file 1 [file 1 › S1 File.xlsx]

## Sheet: MALAT1_1
gRNA	PAM
TGGCCCTTGATAGCTACACG	AGG
Off-targets:
off-target sequence	score	mismatches	UCSC gene	hg19 location	hg38 location		next gene	next gene location (hg38)			off-target distance to TSS	log2 off-target distance to TSS	rank	frequency
TGGCCCTGAACAGATACACGAAG	0.1	4MMs [8:9:11:14]		chr7:-151411619	7:151714538-151714560		AC093583.1-201	Chromosome 7: 151,806,490-151,810,820+			-91952	-16.4886	1	0.0208333			Distance from TSS center vs frequency:
TGTCCCATGATAGCTACAGACAG	0.1	4MMs [3:7:19:20]		chr13:+112165928	13:111513583-111513605		AL359649.1-201	Chromosome 13: 111,588,201-111,589,941+			-74596	-16.1868	2	0.0416667
CTGCCCTTGGTAGCCACACGCAG	0.4	4MMs [1:2:10:15]		chr3:+71758137	3:71708988-71709010		GPR27-201	Chromosome 3: 71,754,050-71,756,496+			-45040	-15.4589	3	0.0625
TGGCCATTGACACCAACACGTGG	0.0	4MMs [6:11:13:15]		chrX:+9327872	X:9359834-9359856		AC073488.1-201	Chromosome X: 9,402,751-9,404,802+			-42895	-15.3885	4	0.0833333
TGGCCCTTCAGAGCTACAGAGGG	0.1	4MMs [9:11:19:20]		chr1:+206615531	1:206442183-206442205		IKBKE-206	Chromosome 1: 206,470,476-206,478,297+			-28271	-14.787	5	0.104167
TGGACCTTGGTAGCTTCCCGGGG	0.0	4MMs [4:10:16:18]		chr14:-69283000	14:68816288-68816310		ZFP36L1-206	Chromosome 14: 68,789,945-68,796,253-			-20035	-14.2902	6	0.125
GTGACCTTGATAGCTACAAGTGG	0.5	4MMs [1:2:4:19]		chr11:-129177376	11:129307486-129307508		ZNF123P-201	Chromosome 11: 129,295,286-129,296,481-			-11005	-13.4259	7	0.145833
CAGCACCTGATAGCTACACGGAG	0.9	4MMs [1:2:5:7]		chr16:+57782889	16:57748979-57749001		AC092118.2-201	Chromosome 16: 57,759,358-57,760,024+			-10357	-13.3383	8	0.166667
AGGCCGTTGATAGCTGCAGGCAG	0.1	4MMs [1:6:16:19]		chr16:-18514964	16:18421112-18421134		MIR3179-3-201	Chromosome 16: 18,411,894-18,411,977-			-9135	-13.1572	9	0.1875
AGGCCGTTGATAGCTGCAGGCAG	0.1	4MMs [1:6:16:19]		chr16:+14986201	16:14892346-14892368		AC136443.3-201	Chromosome 16: 14,901,499-14,902,174+			-9131	-13.1566	10	0.208333
TGGCCCTGGAGAGCCACAGGTGG	0.1	4MMs [8:11:15:19]		chr1:+33764284	1:33298685-33298707		AL513327.1-201	Chromosome 1: 33,307,348-33,325,898+			-8641	-13.077	11	0.229167
TGGACCTTGATGGCTCCAGGCAG	0.0	4MMs [4:12:16:19]		chr10:+122187996	10:120428486-120428508		AC073587.1-201	Chromosome 10: 120,434,983-120,440,376+			-6475	-12.6607	12	0.25
TGGCCCTGGTGAGCCACACGTGG	0.2	4MMs [8:10:11:15]		chr15:-29123497	15:28878356-28878378		APBA2-212	Chromosome 15: 28,884,483-29,117,717+			-6127	-12.581	13	0.270833
TGACCCTTGCTAGGTACACCGGG	0.1	4MMs [3:10:14:20]		chr3:-185660824	3:185943041-185943063		TRA2B-205	Chromosome 3: 185,915,906-185,938,136-			-4905	-12.26	14	0.291667
TGGCCCTTTATTGCTAAACATGG	0.1	4MMs [9:12:17:20]		chr12:-67201705	12:66807930-66807952		GRIP1-213	Chromosome 12: 66,529,845-66,804,186-			-3744	-11.8704	15	0.3125
GGGCCCTTGACAGCCACACTGAG	0.1	4MMs [1:11:15:20]		chr1:+27934089	1:27607580-27607602		AHDC1-203	Chromosome 1: 27,558,708-27,604,431-			-3171	-11.6307	16	0.333333
TGGGACTAGATAGCTACACACAG	0.7	4MMs [4:5:8:20]		chr8:+94032871	8:93020645-93020667		TRIQK-212	Chromosome 8: 92,885,320-93,017,673-			-2994	-11.5479	17	0.354167
TGGCCATTGCTAGCTAAAAGGGG	0.1	4MMs [6:10:17:19]		chr7:-129427381	7:129787546-129787568		AC084864.1-201	Chromosome 7: 129,783,370-129,785,185-			-2361	-11.2052	18	0.375
TGCCCCTTGATTGCTCCAGGGGG	0.0	4MMs [3:12:16:19]		chr7:-95105812	7:95476505-95476527		ASB4-201	Chromosome 7: 95,478,444-95,496,182+			-1939	-10.9211	19	0.395833
TCGTCCTTGAGAGCAACACGGGG	0.2	4MMs [2:4:11:15]	NM_001261414	chr12:-24715483	12:24562554-24562576		AC069208.1-205	Chromosome 12: 24,331,286-24,562,544-			-10	-3.32193	20	0.416667
TGGCCCTTGTCAGCTGCACAGGG	0.1	4MMs [10:11:16:20]		chr10:+45647279	10:45151833-45151855		ANKRD54P1-201	Chromosome 10: 45,151,445-45,151,915-			60	5.90689	21	0.4375
TGGGCCTTGATATCCACACAAGG	0.1	4MMs [4:13:15:20]		chr7:+142143992	7:142487931-142487953		TRBV6-7-201	Chromosome 7: 142,487,863-142,488,295+			90	6.49185	22	0.458333
AGGCCGTTGATAGCTGCAGGCAG	0.1	4MMs [1:6:16:19]		chr16:+16384857	16:16291002-16291024		AC136624.3-201	Chromosome 16: 16,290,135-16,292,242-			1218	10.2503	23	0.479167
TTGCCCTTCACAGCTACACAAGG	0.2	4MMs [2:9:11:20]		chr11:-8791610	11:8770068-8770090		AC026894.1-201	Chromosome 11: 8,768,778-8,785,771+			1312	10.3576	24	0.5
TGGCCCCTGAGAGCCACACCTAG	0.1	4MMs [7:11:15:20]		chr12:-131505319	12:131020779-131020801		AC078925.2-201	Chromosome 12: 131,022,769-131,024,741-			3962	11.952	25	0.520833
TGGGCCTTGAGAGCTAAAAGTGG	0.1	4MMs [4:11:17:19]		chr14:-77603009	14:77136671-77136693		ZDHHC22-203	Chromosome 14: 77,139,410-77,140,744-			4073	11.9919	26	0.541667
TGGCCCTTGGAAGCCACACCTGG	0.1	4MMs [10:11:15:20]		chr16:+57121950	16:57088040-57088062		AC009090.2-201	Chromosome 16: 57,091,213-57,092,303-			4241	12.0502	27	0.5625
TGGCCCTCGGGAGCTACAGGAGG	0.2	4MMs [8:10:11:19]		chrX:+1504432	X:1385541-1385563		SLC25A6-203	Chromosome X: 1,387,345-1,392,088-			6525	12.6718	28	0.583333
TGGCCCTTGTTAGCAACACGGGG	1.6	2MMs [10:15]		chr21:-43764539	21:42344435-42344457		TFF2-201	Chromosome 21: 42,346,357-42,351,128-			6693	12.7084	29	0.604167
TGGCCTTTGACAGCCACACTGGG	0.1	4MMs [6:11:15:20]		chrX:+133663840	X:134529812-134529834		AC004383.1-201	Chromosome X: 134,522,702-134,522,990+			7132	12.8001	30	0.625
TGGGCCTAGAGAGCTACATGTGG	0.3	4MMs [4:8:11:19]		chr14:-50464914	14:49998201-49998223		LINC01588-203	Chromosome 14: 49,991,555-50,006,519-			8318	13.022	31	0.645833
TGGCCATTGGTAACTACACGTGG	0.6	3MMs [6:10:13]		chr2:-10132694	2:9992571-9992593		AC010969.1-201	Chromosome 2: 10,003,158-10,006,030-			13459	13.7163	32	0.666667
AGGCCCATGATAGATATACGAAG	0.1	4MMs [1:7:14:17]		chr5:+109162399	5:109826700-109826722		AC008417.1-201	Chromosome 5: 109,840,128-109,840,692-			13970	13.77	33	0.6875
TGGCCCTGGAGCTCTACACGCAG	0.1	4MMs [8:11:12:13]	NM_005110	chr5:-179734231	5:180307236-180307258		AC008610.1-201	Chromosome 5: 180,293,245-180,295,253+			13991	13.7722	34	0.708333
AGGCCATTGATAGCGACAGGAAG	0.1	4MMs [1:6:15:19]		chr7:+18975044	7:18935423-18935445		NPM1P13-201	Chromosome 7: 18,948,898-18,949,762-			14317	13.8054	35	0.729167
TGGCGCTTGACGGCTACACAGAG	0.2	4MMs [5:11:12:20]	NM_017525	chr11:+64597303	11:64829833-64829855		CDC42BPG-201	Chromosome 11: 64,823,387-64,844,569-			14714	13.8449	36	0.75
TGGTCCTTGCTAGCCACACACAG	0.2	4MMs [4:10:15:20]		chr16:-79315789	16:79281897-79281919		RNA5SP431-201	Chromosome 16: 79,264,454-79,264,573+			17443	14.0904	37	0.770833
GGGCACTTGCTGGCTACACGTGG	0.7	4MMs [1:5:10:12]		chr20:+61023894	20:62448840-62448862		AL121832.1-204	Chromosome 20: 62,430,773-62,431,515+			18089	14.1428	38	0.791667
GGGGCCTTGACAGCTACACTGAG	0.4	4MMs [1:4:11:20]		chr1:-206901825	1:206728485-206728507		Y_RNA.20-201	Chromosome 1: 206,747,980-206,748,092-			19607	14.2591	39	0.8125
AGGCCCTTGATAGCTAGGCCAGG	0.1	4MMs [1:17:18:20]		chr11:-76409664	11:76698625-76698647		GUCY2EP-201	Chromosome 11: 76,712,396-76,719,608-			20983	14.3569	40	0.833333
TTCCCCCTGATAGCTACAAGGAG	0.3	4MMs [2:3:7:19]		chr11:-19591545	11:19570003-19570025		SNORA1.3-201	Chromosome 11: 19,591,156-19,591,291-			21288	14.3778	41	0.854167
TGGGCCGTGATAGCTTCACGAGG	0.3	3MMs [4:7:16]		chr11:+1005800	11:1005802-1005824		MUC6-201	Chromosome 11: 1,012,821-1,036,706-			30882	14.9145	42	0.875
TGGCCATTGATATCTACAAACAG	0.0	4MMs [6:13:19:20]		chr13:+61399559	13:60825427-60825449		RNY3P5-201	Chromosome 13: 60,789,560-60,789,661+			35889	15.1313	43	0.895833
TGCCCCTTGCTAGTTACAGGGAG	0.1	4MMs [3:10:14:19]		chr8:-773401	8:823406-823428		AC026950.2-201	Chromosome 8: 891,251-893,112-			69706	16.089	44	0.916667
TGGCACTTTATAGCTGCAGGTAG	0.1	4MMs [5:9:16:19]		chr17:+6003372	17:6100054-6100076		AC104770.1-202	Chromosome 17: 6,189,454-6,190,541-			90465	16.4651	45	0.9375
TGGCCCTGAAGAGATACACGGGG	0.1	4MMs [8:9:11:14]		chr4:-172838178	4:171917032-171917054		GALNTL6-205	Chromosome 4: 171,812,254-171,815,579+			104778	16.677	46	0.958333
TGGGCCTTAACAGCTACATGAAG	0.2	4MMs [4:9:11:19]		chr2:+164253881	2:163397373-163397395		RNU6-627P-201	Chromosome 2: 163,288,995-163,289,096+			108400	16.726	47	0.979167
TGGCCCTGCATTGTTACACGAGG	0.1	4MMs [8:9:12:14]		chr1:+198780844	1:198811717-198811739		MIR181A1HG-203	Chromosome 1: 198,898,466-198,937,429-			125690	16.9395	48	1
TGGCCCTCGGGAGCTACAGGAGG	0.2	4MMs [8:10:11:19]		chrY:+1454432	not identified

## Sheet: MALAT1_2
gRNA	PAM
CCTACCGCACAGCTCGGGCG	AGG
Off-targets:
off-target sequence	score	mismatches	UCSC gene	hg19 location	hg38 location		next gene	next gene location (hg38)			off-target distance to TSS	log2 off-target distance to TSS	rank	frequency
CCTACCCCACAGCTGGTGCTCAG	0.0	4MMs [7:15:17:20]		chr4:+174668911	4:173747762-173747784		RANP6-201	Chromosome 4: 173,633,728-173,634,371-			-113413	-16.7912	1	0.0204082			Distance from TSS center vs frequency:
CCTCCCCCACAGCTGGGACGTGG	0.1	4MMs [4:7:15:18]		chr2:+239947726	2:239026032-239026054		LINC01940-201	Chromosome 2: 238,919,302-238,926,269-			-99785	-16.6065	2	0.0408163
CCTGCCGCTCAGCTCAGGCAGAG	0.1	4MMs [4:9:16:20]		chr10:-134674897	10:132861398-132861420		NKX6-2-201	Chromosome 10: 132,783,181-132,786,052-			-75346	-16.2012	3	0.0612245
CCCACCACACAGCTCTGCCGGGG	0.0	4MMs [3:7:16:18]		chr3:-185893306	3:186175522-186175544		ETV5-207	Chromosome 3: 186,080,017-186,110,318-			-65204	-15.9927	4	0.0816327
CCTAACACACAGCTGGGGAGGAG	0.1	4MMs [5:7:15:19]	NM_080841	chr20:-2988121	20:3007480-3007502		GNRH2-201	Chromosome 20: 3,043,622-3,045,747+			-36142	-15.1414	5	0.102041
CGGACCGCACCGCTGGGGCGAGG	0.2	4MMs [2:3:11:15]		chr2:+8785628	2:8645500-8645522		AC011747.1-201	Chromosome 2: 8,600,892-8,622,942-			-22580	-14.4628	6	0.122449
CCTTCCCCACAGCTGGGGTGGGG	0.1	4MMs [4:7:15:19]		chr15:+72468678	15:72176339-72176361		AC020779.2-201	Chromosome 15: 72,140,504-72,155,459-			-20902	-14.3514	7	0.142857
CCGACCGCGAAGCTCGGCCGCAG	0.2	4MMs [3:9:10:18]		chr14:-69283058	14:68816346-68816368		ZFP36L1-206	Chromosome 14: 68,789,945-68,796,253-			-20093	-14.2944	8	0.163265
CCCACGGCCCAGCGCGGGCGAGG	0.1	4MMs [3:6:9:14]		chr1:+22218823	1:21892332-21892354		AL590556.1-201	Chromosome 1: 21,908,098-21,908,580+			-15744	-13.9425	9	0.183673
CCTACTGCAGAGCTGGGGGGGGG	0.1	4MMs [6:10:15:19]		chr16:+58640811	16:58606909-58606931		AC010287.1-201	Chromosome 16: 58,597,589-58,597,945-			-8986	-13.1335	10	0.204082
CCTACCAAACAGCTCTGGGGGAG	0.1	4MMs [7:8:16:19]		chr19:+42425254	19:41921104-41921126		ARHGEF1-209	Chromosome 19: 41,928,590-41,929,846+			-7464	-12.8657	11	0.22449
TCCACTGCACAACTCGGGCGGGG	0.4	4MMs [1:3:6:12]	NM_015481	chr12:-54763121	12:54369342-54369364		GPR84-201	Chromosome 12: 54,362,445-54,364,474-			-4868	-12.2491	12	0.244898
CCTAGCGCAGAGGTGGGGCGTAG	0.1	4MMs [5:10:13:15]		chr22:+30945927	22:30549942-30549964		SEC14L6-201	Chromosome 22: 30,522,799-30,546,682-			-3282	-11.6804	13	0.265306
CCCCCCGGACAGCCCGGGCGCGG	0.2	4MMs [3:4:8:14]		chr10:-134602222	10:132788723-132788745		NKX6-2-201	Chromosome 10: 132,783,181-132,786,052-			-2693	-11.395	14	0.285714
CCTACCCCAGAGCTGGGGCTCAG	0.1	4MMs [7:10:15:20]		chr16:+85852014	16:85818410-85818432		AC018695.1-201	Chromosome 16: 85,815,873-85,816,536-			-1896	-10.8887	15	0.306122
CCCACCGCACACCTGGCGCGCGG	0.1	4MMs [3:12:15:17]		chr20:-821678	20:841040-841062		RPS10P5-201	Chromosome 20: 839,447-839,977-			-1063	-10.0539	16	0.326531
CCCACCGCCCGGCTCGCGCGCAG	0.2	4MMs [3:9:11:17]		chr9:+80646677	9:78031763-78031785		GNAQ-201	Chromosome 9: 77,716,087-78,031,458-			-327	-8.35315	17	0.346939
CTGACCACTCAGCTCGGGCGTGG	0.6	4MMs [2:3:7:9]		chr1:-165567554	1:165598322-165598344		AL356441.1-201	Chromosome 1: 165,598,463-165,623,331+			-141	-7.13955	18	0.367347
CCCAGCGCACACCTCGGCCGGGG	0.2	4MMs [3:5:12:18]		chr1:-247495257	1:247331960-247331982		ZNF496-205	Chromosome 1: 247,328,676-247,331,846-			-114	-6.83289	19	0.387755
CCTTCAGCACAGCTGGGGCACAG	0.1	4MMs [4:6:15:20]		chr8:-56433632	8:55521078-55521100		AC090200.1-201	Chromosome 8: 55,517,240-55,520,977-			-101	-6.65821	20	0.408163
CCTCCCCCACAGCAGGGGCGGGG	0.0	4MMs [4:7:14:15]	NM_002032	chr11:-61735205	11:61967738-61967760		AP003733.4-201	Chromosome 11: 61,967,794-61,969,490+			-56	-5.80735	21	0.428571
CTCAGCGCAGAGCTCGGGCGCGG	1.3	4MMs [2:3:5:10]	NM_015193	chr8:-143695819	8:142614463-142614485		ARC-201	Chromosome 8: 142,611,044-142,614,472-			9	3.16993	22	0.44898
CCTCCCGCCCAGCCCGGGCCCGG	0.1	4MMs [4:9:14:20]	NR_045116	chr5:+131746366	5:132410676-132410698		C5orf56-203	Chromosome 5: 132,410,636-132,476,044+			62	5.9542	23	0.469388
CCCACCCCACAGCCCGGGGGCGG	0.1	4MMs [3:7:14:19]	NM_017573	chr19:+1490265	19:1490268-1490290		PCSK4-208	Chromosome 19: 1,487,218-1,490,377-			87	6.44294	24	0.489796
CCTCCCGCTCGCCTCGGGCGAGG	0.2	4MMs [4:9:11:12]		chr17:-43298875	17:45221513-45221535		AC008105.3-201	Chromosome 17: 45,190,931-45,221,765-			252	7.97728	25	0.510204
GGTACAGCACAGCGCGGGCGCGG	0.1	4MMs [1:2:6:14]	NM_017898	chr1:+220922143	1:220748803-220748825		MARC2-204	Chromosome 1: 220,748,225-220,755,060+			600	9.22882	26	0.530612
CCCACCGCACTGCTGGGGGGGGG	0.1	4MMs [3:11:15:19]		chr15:+90357208	15:89813978-89814000		ANPEP-201	Chromosome 15: 89,784,889-89,814,862-			862	9.75154	27	0.55102
ACTAAGGCACAGCTAGGGCGGGG	0.3	4MMs [1:5:6:15]	NR_003143	chr2:+33951627	2:33726562-33726584		MYADML-202	Chromosome 2: 33,722,721-33,727,564-			980	9.93664	28	0.571429
CCGACGGCACAGCTCAGGCCAAG	0.1	4MMs [3:6:16:20]		chr17:+76245295	17:78249216-78249238		AC087645.4-201	Chromosome 17: 78,248,193-78,251,440+			1045	10.0293	29	0.591837
GCTACTGCACAGCTAGGGTGAAG	0.1	4MMs [1:6:15:19]		chr6:-167414501	6:167001018-167001040		FGFR1OP-203	Chromosome 6: 166,999,617-167,004,304+			1401	10.4522	30	0.612245
CCTTCTGGACAGCTCCGGCGGAG	0.2	4MMs [4:6:8:16]		chr2:-206949409	2:206084690-206084712		INO80D-202	Chromosome 2: 206,062,906-206,086,303-			1613	10.6555	31	0.632653
CCTTCAGCACAGCTCGGGGTGGG	0.1	4MMs [4:6:19:20]		chr7:+97843686	7:98214376-98214398		BHLHA15-201	Chromosome 7: 98,212,254-98,212,959+			2144	11.0661	32	0.653061
GCCACCGGATAGCTCGGGCGGAG	1.3	4MMs [1:3:8:10]		chr1:-146552555	1:147081011-147081033		AC241584.1-201	Chromosome 1: 147,082,338-147,083,578-			2567	11.3259	33	0.673469
CCTACCGCCCAGTTAGGGCTAGG	0.0	4MMs [9:13:15:20]		chr17:-79175074	17:81201279-81201301		CEP131-204	Chromosome 17: 81,199,818-81,204,071-			2792	11.4471	34	0.693878
CCTTCCGCAGAGCTCCTGCGTAG	0.1	4MMs [4:10:16:17]		chr11:-69289696	11:69474933-69474955		AP000439.2-201	Chromosome 11: 69,477,133-69,479,940-			5007	12.2897	35	0.714286
TCTACCGGACAGCTCGTGGGTGG	0.2	4MMs [1:8:17:19]		chr16:-85324335	16:85290734-85290756		LINC00311-201	Chromosome 16: 85,282,958-85,285,963+			7776	12.9248	36	0.734694
CCTCCCCCACAGCCCGGGTGCAG	0.1	4MMs [4:7:14:19]		chr22:-24823938	22:24427975-24427997		ADORA2A-207	Chromosome 22: 24,417,879-24,433,192+			10096	13.3015	37	0.755102
CCCACCACACACCTCGGGCCAAG	0.2	4MMs [3:7:12:20]		chr12:-132352494	12:131867954-131867976		AC131009.2-201	Chromosome 12: 131,857,420-131,864,538+			10534	13.3628	38	0.77551
CCTGCCCCACCGCTGGGGCGAGG	0.2	4MMs [4:7:11:15]		chr8:-143684276	8:142602920-142602942		ARC-201	Chromosome 8: 142,611,044-142,614,472-			11552	13.4959	39	0.795918
CCTAGCTCACAGCTAGGGTGCAG	0.1	4MMs [5:7:15:19]		chr1:-224020512	1:223832815-223832837		TP53BP2-206	Chromosome 1: 223,814,176-223,845,794-			12979	13.6639	40	0.816327
CCTTCGGCAGAGCCCGGGCGGAG	0.1	4MMs [4:6:10:14]	NR_039713	chr11:+118781338	11:118910631-118910653		BCL9L-205	Chromosome 11: 118,908,417-118,925,453-			14800	13.8533	41	0.836735
CTTACGGCCCAGCTCGGTCGCAG	0.1	4MMs [2:6:9:18]		chr11:-69990345	11:70144244-70144266		AP000879.2-201	Chromosome 11: 70,129,297-70,149,623+			14947	13.8676	42	0.857143
GCTACTCCACAGCTCGGGCTGAG	0.3	4MMs [1:6:7:20]		chr11:-126208735	11:126338845-126338867		GSEC-202	Chromosome 11: 126,340,889-126,355,579-			16734	14.0305	43	0.877551
CCTCCCTCACAGCTCTGACGGAG	0.0	4MMs [4:7:16:18]		chr12:+121716978	12:121279177-121279199		CAMKK2-201	Chromosome 12: 121,237,697-121,298,308-			19109	14.222	44	0.897959
CCCACTGCAGAGCTCGGGCCCAG	0.4	4MMs [3:6:10:20]		chr14:+101027308	14:100560973-100560995		AL845552.2-201	Chromosome 14: 100,538,939-100,540,409+			22056	14.4289	45	0.918367
CCCACCCCACAGCGCGTGCGCAG	0.1	4MMs [3:7:14:17]		chr14:-94640384	14:94174052-94174074		PPP4R4-206	Chromosome 14: 94,146,128-94,230,619+			27924	14.7692	46	0.938776
CCTACAGCACATATCTGGCGTGG	0.0	4MMs [6:12:13:16]		chr16:-16970045	16:16876193-16876215		AC098965.1-201	Chromosome 16: 16,952,502-16,953,468-			77275	16.2377	47	0.959184
CCTGCAGCACAGCTCGGGTTTAG	0.1	4MMs [4:6:19:20]		chr20:-60560292	20:61985241-61985263		TAF4-207	Chromosome 20: 62,012,874-62,064,366-			79103	16.2714	48	0.979592
CCTCCAGCACAGCTCTGGAGTGG	0.1	4MMs [4:6:16:19]		chr10:-132636270	10:130838012-130838034		MIR378C-201	Chromosome 10: 130,962,588-130,962,668-			124656	16.9276	49	1

## Sheet: miR-146_1
gRNA	PAM
ATAATTCGGGCTACCTGCTA	TGG
Off-targets:
off-target sequence	score	mismatches	UCSC gene	hg19 location	hg38 location		next gene	next gene location (hg38)			off-target distance to TSS	log2 off-target distance to TSS	rank	frequency
ATAATTCAGGGTACTTTCTAGGG	0.1	4MMs [8:11:15:17]		chr11:+83722640	11:84011599-84011621		LDHAL6DP-201	Chromosome 11: 83,814,571-83,815,263-			-196358	-17.5831	1	0.02			Distance from TSS center vs frequency:
ATAATTCATGATACCTACTAAAG	0.2	4MMs [8:9:11:17]		chr4:+107924145	4:107002990-107003012		ACTR6P1-201	Chromosome 4: 106,836,498-106,837,601-			-165411	-17.3357	2	0.04
AGAATTCTGGTTACCTGGTAGGG	0.2	4MMs [2:8:11:18]		chr8:+35577586	8:35720070-35720092		AC100818.1-201	Chromosome 8: 35,862,123-35,930,710+			-142031	-17.1158	3	0.06
ATCAGTAGGGATACCTGCTATGG	0.5	4MMs [3:5:7:11]		chr14:+84529930	14:84063588-84063610		MTND4P33-201	Chromosome 14: 84,172,841-84,173,606+			-109231	-16.737	4	0.08
ATAATTCTGTCTGCCTACTAGGG	0.2	4MMs [8:10:13:17]		chr2:-107873714	2:107257263-107257285		AC096669.1-201	Chromosome 2: 107,362,282-107,406,260+			-105019	-16.6803	5	0.1
ATTATCCAGGCTACCTGTTACAG	0.2	4MMs [3:6:8:18]		chr16:+55596831	16:55562921-55562943		MMP2-AS1-202	Chromosome 16: 55,427,558-55,462,297-			-100646	-16.6189	6	0.12
AAAATTCGGACTACCTGTTGTAG	0.1	4MMs [2:10:18:20]		chr11:+106793670	11:106922946-106922968		AP001282.1-201	Chromosome 11: 106,826,392-106,827,890-			-95078	-16.5368	7	0.14
ATAATTAAGTCTTCCTGCTAAAG	0.3	4MMs [7:8:10:13]		chr6:-141409695	6:141088563-141088585		AL357080.1-201	Chromosome 6: 141,019,788-141,020,026-			-68537	-16.0646	8	0.16
ACAATTCAGGCTACGTGATATAG	0.1	4MMs [2:8:15:18]		chr15:-84014158	15:83345411-83345433		BNC1-201	Chromosome 15: 83,255,903-83,284,714-			-60697	-15.8893	9	0.18
ACAATTAGAGCTACCTGCTGAGG	0.3	4MMs [2:7:9:20]		chr3:+173307129	3:173589341-173589363		AC092967.1-201	Chromosome 3: 173,644,231-173,644,711+			-54868	-15.7437	10	0.2
AGAATTCGTGCTTCTTGCTATGG	0.1	4MMs [2:9:13:15]		chr10:+24409392	10:24120465-24120487		NUP35P1-201	Chromosome 10: 24,157,835-24,158,781+			-37348	-15.1887	11	0.22
ATAACTCAGGCTACCTACAACAG	0.2	4MMs [5:8:17:19]		chrX:+121635521	X:122501670-122501692		RPL3P12-201	Chromosome X: 122,538,253-122,539,460+			-36561	-15.158	12	0.24
ATCATTCTGTCTACCTGCAAGGG	0.5	4MMs [3:8:10:19]		chr12:-57774176	12:57380398-57380420		RNU6-879P-201	Chromosome 12: 57,415,296-57,415,403+			-34898	-15.0909	13	0.26
AAAACTGGGGCTACATGCTACAG	0.3	4MMs [2:5:7:15]		chr11:-109390471	11:109519750-109519772		AP003049.1-201	Chromosome 11: 109,486,968-109,487,424-			-32326	-14.9804	14	0.28
CTAAATCGGGGCACCTGCTACAG	0.4	4MMs [1:5:11:12]	NM_032873	chr11:+122680835	11:122810129-122810151		CRTAM-201	Chromosome 11: 122,838,500-122,872,639+			-28349	-14.791	15	0.3
ATAATTCCTGGTACATGCTAGAG	0.1	4MMs [8:9:11:15]		chr5:+71759945	5:72464120-72464142		AC093278.2-201	Chromosome 5: 72,439,903-72,442,387-			-21755	-14.4091	16	0.32
AAAATTTGGGATAGCTGCTAAAG	0.1	4MMs [2:7:11:14]		chr4:-38636157	4:38634541-38634563		AC021860.1-201	Chromosome 4: 38,618,265-38,619,437-			-15104	-13.8826	17	0.34
AAACTTCGGACTACCTGATAAAG	0.3	4MMs [2:4:10:18]		chr16:+54162720	16:54128810-54128832		AC007347.2-201	Chromosome 16: 54,114,697-54,114,878-			-13954	-13.7684	18	0.36
TTAATTCTGACTACCAGCTAGGG	0.3	4MMs [1:8:10:16]		chr4:-131434671	4:130513521-130513543		GAPDHP56-201	Chromosome 4: 130,503,357-130,504,344-			-9177	-13.1638	19	0.38
GTAATTTTGCCTACCTGCTACAG	0.9	4MMs [1:7:8:10]		chr6:+114666347	6:114345185-114345207		HS3ST5-201	Chromosome 6: 114,055,586-114,343,045-			-2162	-11.0782	20	0.4
CAAATGCGGGCTACCTGATATAG	0.2	4MMs [1:2:6:18]		chr9:+89875953	9:87261040-87261062		SNORA26.3-201	Chromosome 9: 87,260,450-87,260,585+			612	9.25739	21	0.42
GTAGTTCAGGCTACCTGCTGTAG	0.7	4MMs [1:4:8:20]		chr20:+57228151	20:58653097-58653119		STX16-205	Chromosome 20: 58,651,253-58,679,524+			1866	10.8657	22	0.44
CTAGTTCGGCCCACCTGCTACAG	0.7	4MMs [1:4:10:12]		chr1:+21594953	1:21268462-21268484		AL031005.1-201	Chromosome 1: 21,266,082-21,267,251+			2402	11.23	23	0.46
ATAATTGAAGCTACCTGGTATAG	0.1	4MMs [7:8:9:18]		chr11:-14668336	11:14646795-14646817		PDE3B-205	Chromosome 11: 14,644,260-14,776,663+			2535	11.3078	24	0.48
ATTCTTTGGGCCACCTGCTATAG	0.5	4MMs [3:4:7:12]		chr8:-7957081	8:8099564-8099586		AC105233.1-201	Chromosome 8: 8,095,946-8,096,726+			3618	11.821	25	0.5
ATTCTTTGGGCCACCTGCTATAG	0.5	4MMs [3:4:7:12]		chr8:+7045436	8:7187916-7187938		AF228730.1-201	Chromosome 8: 7,190,901-7,191,563-			3625	11.8238	26	0.52
CTAAGTCAGACTACCTGCTATGG	1.3	4MMs [1:5:8:10]		chrX:+142526010	X:143438218-143438240		MTND2P39-201	Chromosome X: 143,434,517-143,435,280+			3723	11.8622	27	0.54
GTCATTAGGGCTACCTGCAAAAG	0.4	4MMs [1:3:7:19]		chr1:-231000026	1:230864285-230864307		C1orf198-203	Chromosome 1: 230,837,119-230,869,589-			5304	12.3729	28	0.56
ATCAGTCAGGCTACCTGCCACAG	0.5	4MMs [3:5:8:19]		chr20:+1175211	20:1194569-1194591		AL031665.1-201	Chromosome 20: 1,186,092-1,207,036+			8499	13.0531	29	0.58
GTGATTCGGGCTACCAGCTGCAG	0.1	4MMs [1:3:16:20]	NM_001114099	chr16:-29899926	16:29888610-29888632		SEZ6L2-202	Chromosome 16: 29,871,159-29,899,064-			10454	13.3518	30	0.6
GTATTTTTGGCTACCTGCTAAGG	0.9	4MMs [1:4:7:8]		chr3:+99668869	3:99950027-99950049		MIR3921-201	Chromosome 3: 99,964,314-99,964,398-			14340	13.8078	31	0.62
ATATTTCTGTTTACCTGCTAGAG	0.7	4MMs [4:8:10:11]		chr14:+93619822	14:93153479-93153501		AL110118.1-201	Chromosome 14: 93,138,066-93,138,465+			15435	13.9139	32	0.64
ATAATTCTTGCCTCCTGCTATGG	0.2	4MMs [8:9:12:13]		chr11:+83013458	11:83302417-83302439		AP000446.1-202	Chromosome 11: 83,286,359-83,305,124+			16080	13.973	33	0.66
ATAATTCAGGCAACCTCCTTCAG	0.1	4MMs [8:12:17:20]		chr3:-197202677	3:197475811-197475833		AC128709.3-201	Chromosome 3: 197,458,405-197,467,105+			17406	14.0873	34	0.68
TTAAATGAGGCTACCTGCTAGAG	0.9	4MMs [1:5:7:8]		chr1:-45168928	1:44703261-44703283		RNU5F-1-201	Chromosome 1: 44,721,786-44,721,902-			18641	14.1862	35	0.7
ATAGTTCATGCTGCCTGCTACGG	0.3	4MMs [4:8:9:13]		chr5:-134716198	5:135380513-135380535		H2AFY-202	Chromosome 5: 135,334,410-135,399,211-			18698	14.1906	36	0.72
ATATTTGGGGCTACCTGGGAGGG	0.1	4MMs [4:7:18:19]		chr20:+55811599	20:57236545-57236567		BMP7-AS1-201	Chromosome 20: 57,214,872-57,215,866+			21695	14.4051	37	0.74
ATCAGCCTGGCTACCTGCTATGG	0.8	4MMs [3:5:6:8]		chr9:-86915722	9:84300812-84300834		AL356134.1-201	Chromosome 9: 84,278,219-84,290,131+			22593	14.4636	38	0.76
AAGATTCGGTCTTCCTGCTAGGG	0.5	4MMs [2:3:10:13]		chr9:+22169260	9:22169263-22169285		AL157937.1-201	Chromosome 9: 22,203,990-22,214,672-			45387	15.47	39	0.78
ATATTTCTGGCTCCCTGCTCTAG	0.3	4MMs [4:8:13:20]		chr1:+113811002	1:113268382-113268404		AL357055.2-201	Chromosome 1: 113,198,825-113,199,258+			69579	16.0864	40	0.8
AAAATTGGGGATTCCTGCTACAG	0.2	4MMs [2:7:11:13]	NM_017794	chr9:-20881973	9:20881979-20882001		SNORA30B-201	Chromosome 9: 20,786,927-20,787,055+			95052	16.5364	41	0.82
AGAATTCATCCTACCTGCTAAAG	0.8	4MMs [2:8:9:10]		chr12:+91874483	12:91480708-91480730		AC025035.1-201	Chromosome 12: 91,362,196-91,368,606+			118534	16.8549	42	0.84
ATATTTGGGACTACCAGCTATGG	0.2	4MMs [4:7:10:16]		chr16:-6231507	16:6181511-6181533		AC009135.1-201	Chromosome 16: 6,056,975-6,092,954+			124536	16.9262	43	0.86
ATAATGAGGGCTGCCTGCCACAG	0.1	4MMs [6:7:13:19]		chr10:+63810507	10:62050750-62050772		ARID5B-201	Chromosome 10: 61,901,300-62,096,944+			149472	17.1895	44	0.88
ATAATTTGCACTACTTGCTATGG	0.1	4MMs [7:9:10:15]		chr2:+205937470	2:205072749-205072771		AC008171.1-201	Chromosome 2: 205,253,304-205,253,503-			180732	17.4635	45	0.9
ATAATTAGGACTACCTAGTACAG	0.1	4MMs [7:10:17:18]		chr2:+14049545	2:13909422-13909444		AC016730.1-201	Chromosome 2: 13,723,048-13,758,152+			186396	17.508	46	0.92
ATAATACGGACTACCTGGTATGG	0.3	3MMs [6:10:18]		chr9:+78702710	9:76087796-76087818		PCSK5-201	Chromosome 9: 75,890,705-76,195,889+			197113	17.5887	47	0.94
CTAATTTTGGCAACCTGCTATGG	0.5	4MMs [1:7:8:12]		chr4:+10952766	4:10951144-10951166		LINC02498-201	Chromosome 4: 10,737,572-10,749,586+			213594	17.7045	48	0.96
ATAATGCTGGCAAACTGCTACAG	0.1	4MMs [6:8:12:14]		chr3:+161896174	3:162178388-162178410		TOMM22P6-201	Chromosome 3: 162,486,541-162,486,949-			308539	18.2351	49	0.98
ACACTTCGGGATTCCTGCTACAG	0.3	4MMs [2:4:11:13]		chr12:+3078779	12:2969615-2969637		TEAD4-204	Chromosome 12: 2,959,944-3,020,759+			1009693	19.9455	50	1

## Sheet: miR-146_2
gRNA	PAM
GTAAATATGGTGCTCTTAGG	AGG
Off-targets:
off-target sequence	score	mismatches	UCSC gene	hg19 location	hg38 location		next gene	next gene location (hg38)			off-target distance to TSS	log2 off-target distance to TSS	rank	frequency
GTAACTATGTTCCTCTCAGGAGG	0.3	4MMs [5:10:12:17]		chr10:+56879471	10:55119713-55119735		AC051618.1-201	Chromosome 10: 54,864,674-54,869,122-			-250613	-17.9351	1	0.0204082			Distance from TSS center vs frequency:
GTACACATGCTGTTCTTAGGCAG	0.3	4MMs [4:6:10:13]		chr15:+33836103	15:33543904-33543926		Y_RNA.99-201	Chromosome 15: 33,722,492-33,722,596+			-178566	-17.4461	2	0.0408163
GCAAATATGTTGCTGTTAGGCAG	0.8	3MMs [2:10:15]		chr20:-15757355	20:15776715-15776737		ENSAP1-201	Chromosome 20: 15,619,494-15,619,819-			-156896	-17.2594	3	0.0612245
GTAGATATGTTTCTTTTAGGTAG	0.2	4MMs [4:10:12:15]		chr7:-52493380	7:52425689-52425711		SNORA31.23-201	Chromosome 7: 52,269,437-52,269,569-			-156120	-17.2523	4	0.0816327
GTAAAGATAATGCTCTTAGATAG	0.2	4MMs [6:9:10:20]		chrX:-97771465	X:98516472-98516494		AL157778.1-201	Chromosome X: 98,573,859-98,864,984+			-57387	-15.8084	5	0.102041
TTAAATATTATGATCTTAGGAGG	0.3	4MMs [1:9:10:13]		chr7:+137581345	7:137896601-137896623		DGKI-202	Chromosome 7: 137,390,524-137,847,092-			-49531	-15.596	6	0.122449
GGAAAAATAGTTCTCTTAGGAAG	0.3	4MMs [2:6:9:12]		chr2:+103850832	2:103234376-103234398		AC010881.1-201	Chromosome 2: 103,275,904-103,276,138+			-41506	-15.341	7	0.142857
GTTAAAGTGATGCTCTTAGGTAG	0.5	4MMs [3:6:7:10]		chr17:+46335468	17:48258108-48258130		THRA1/BTR-203	Chromosome 17: 48,294,375-48,307,700+			-36245	-15.1455	8	0.163265
GTATATTAGGTGCTGTTAGGAGG	0.3	4MMs [4:7:8:15]		chr6:+8753300	6:8753069-8753091		AL591475.1-201	Chromosome 6: 8,784,178-8,785,445+			-31087	-14.924	9	0.183673
GTAAAGGTGTTCCTCTTAGGGAG	0.3	4MMs [6:7:10:12]		chr10:-118268487	10:116508980-116509002		RNU6-1090P-201	Chromosome 10: 116,538,183-116,538,276+			-29203	-14.8338	10	0.204082
CTAAATATGGTGTTATTAGGGAG	0.3	3MMs [1:13:15]		chr12:+50138590	12:49744809-49744831		LSM6P2-201	Chromosome 12: 49,770,960-49,771,136+			-26129	-14.6734	11	0.22449
GTCAATATGTTGCTCTTATGTGG	1.0	3MMs [3:10:19]		chr4:-28846890	4:28845273-28845295		MESTP3-201	Chromosome 4: 28,823,244-28,824,211-			-21062	-14.3624	12	0.244898
TTAAAAATTTTGCTCTTAGGCAG	0.5	4MMs [1:6:9:10]		chr20:-51270613	20:52654079-52654101		RPSAP1-201	Chromosome 20: 52,671,917-52,690,608+			-17838	-14.1227	13	0.265306
GTGAATATGCTTCTCTTAGTTAG	0.3	4MMs [3:10:12:20]		chr1:-178857618	1:178888488-178888510		ANGPTL1-201	Chromosome 1: 178,849,705-178,871,052-			-17436	-14.0898	14	0.285714
GTACATAAGGTACTTTTAGGAAG	0.2	4MMs [4:8:12:15]		chr20:-8044511	20:8063869-8063891		PLCB1-233	Chromosome 20: 8,077,251-8,883,199+			-13382	-13.708	15	0.306122
GGAAATAGGCTGCTATTAGGAAG	0.4	4MMs [2:8:10:15]		chr20:-44394201	20:45765567-45765589		RNU6ATAC38P-201	Chromosome 20: 45,778,698-45,778,823+			-13131	-13.6807	16	0.326531
GAAAATGGGGTGCTCTTGGGAAG	0.2	4MMs [2:7:8:18]		chr9:+3635825	9:3635827-3635849		AL354977.2-201	Chromosome 9: 3,647,335-3,648,338+			-11486	-13.4876	17	0.346939
GTTAATATCATGATCTTAGGTAG	0.3	4MMs [3:9:10:13]		chr6:+100966745	6:100518871-100518893		Z86062.1-201	Chromosome 6: 100,530,276-100,531,052+			-11383	-13.4746	18	0.367347
GTCTGTATGGTGCTCCTAGGCAG	0.3	4MMs [3:4:5:16]		chr15:-99711470	15:99171270-99171292		AC022819.1-201	Chromosome 15: 99,157,231-99,161,140-			-10130	-13.3063	19	0.387755
GGAAATTGGGTGCTGTTAGGAAG	0.3	4MMs [2:7:8:15]		chr10:+102948851	10:101189096-101189118		SMARCE1P7-201	Chromosome 10: 101,181,144-101,181,951-			-7167	-12.8072	20	0.408163
CTCAATCTGGTGCTCTTAGGAAG	1.7	3MMs [1:3:7]	NR_102424	chr7:+90026444	7:90397132-90397154		CLDN12-213	Chromosome 7: 90,403,353-90,413,411+			-6199	-12.5978	21	0.428571
GTGCTTAAGGTGCTCTTAGGAAG	1.3	4MMs [3:4:5:8]		chr1:+157179572	1:157209784-157209806		AL357143.2-201	Chromosome 1: 157,203,604-157,205,062-			-4744	-12.2119	22	0.44898
AAAAATATTGTGCTCTTTGGAAG	0.2	4MMs [1:2:9:18]		chr15:-85289381	15:84746155-84746177		ZNF592-203	Chromosome 15: 84,748,635-84,806,432+			-2480	-11.2761	23	0.469388
TTAAATATCTTCCTCTTAGGTGG	0.4	4MMs [1:9:10:12]		chr5:-114518554	5:115182862-115182884		TRIM36-203	Chromosome 5: 115,171,102-115,180,546-			-2316	-11.1774	24	0.489796
ATCATTATGGTGCTGTTAGGTAG	0.4	4MMs [1:3:5:15]	NM_001249	chr14:-74482542	14:74015844-74015866		ENTPD5-207	Chromosome 14: 73,958,010-74,015,928-			84	6.39232	25	0.510204
AGGAATATGGCGCTCTTAGGCAG	0.8	4MMs [1:2:3:11]	NM_001168341	chr9:-15307102	9:15307109-15307131		TTC39B-208	Chromosome 9: 15,163,622-15,307,360-			251	7.97154	26	0.530612
AGAAATATGGTGCACTTAGGCAG	0.5	3MMs [1:2:14]		chr12:-54392416	12:53998637-53998659		HOXC-AS1-202	Chromosome 12: 53,999,022-53,999,620-			983	9.94105	27	0.55102
GAAAGTATGGTGCTCTAAGAAAG	0.3	4MMs [2:5:17:20]		chr1:-57108654	1:56642986-56643008		PLPP3-203	Chromosome 1: 56,524,308-56,645,301-			2315	11.1768	28	0.571429
GTTAATACTTTGCTCTTAGGAGG	0.8	4MMs [3:8:9:10]		chr14:-20230596	14:19762442-19762464		OR4H12P-201	Chromosome 14: 19,759,868-19,760,774+			2574	11.3298	29	0.591837
GCAGATAGGGGGCTCTTAGGAAG	0.8	4MMs [2:4:8:11]		chr3:-74154400	3:74105254-74105276		AKR1B1P2-201	Chromosome 3: 74,101,349-74,103,553+			3905	11.9311	30	0.612245
ATAAACATGATGCTTTTAGGAGG	0.2	4MMs [1:6:10:15]		chr6:+82479400	6:81769685-81769707		AL078599.1-201	Chromosome 6: 81,764,211-81,764,503+			5496	12.4242	31	0.632653
GTAATTATAATGCTCTGAGGAAG	0.3	4MMs [5:9:10:17]		chr13:+52762935	13:52188802-52188824		MRPS31P5-201	Chromosome 13: 52,167,709-52,194,465-			5641	12.4617	32	0.653061
GTGATTATAGTGCTCTAAGGTGG	0.4	4MMs [3:5:9:17]		chr19:-31406460	19:30915557-30915579		LINC01834-201	Chromosome 19: 30,907,199-30,909,155+			8358	13.0289	33	0.673469
CTAAATCTGGGGGTCTTAGGTAG	0.2	4MMs [1:7:11:13]		chr15:+51347531	15:51055336-51055358		AC073964.1-201	Chromosome 15: 51,064,609-51,069,586-			14228	13.7964	34	0.693878
ATAAATTTGGTTCTCTTATGGAG	0.2	4MMs [1:7:12:19]		chr18:-21661881	18:24081922-24081944		AC090772.2-201	Chromosome 18: 24,076,794-24,099,320-			17398	14.0866	35	0.714286
GTGAGTTTGGTGGTCTTAGGCAG	0.4	4MMs [3:5:7:13]		chr6:-151995939	6:151674809-151674831		ESR1-211	Chromosome 6: 151,656,691-151,807,857+			18118	14.1451	36	0.734694
TTAAATATGATCCTCTTAGGCAG	1.3	3MMs [1:10:12]		chr9:+16647771	9:16647775-16647797		AL450003.1-201	Chromosome 9: 16,625,676-16,626,390+			22121	14.4331	37	0.755102
TTAAATAGCGTGCTCTGAGGAGG	0.4	4MMs [1:8:9:17]		chr2:+122574269	2:121816695-121816717		LINC01823-204	Chromosome 2: 121,790,444-121,796,702+			26273	14.6813	38	0.77551
GAAATCATGGTGCTCTCAGGAAG	0.4	4MMs [2:5:6:17]		chr13:-51571072	13:50996941-50996963		RNA5SP29-201	Chromosome 13: 51,027,747-51,027,852-			30911	14.9158	39	0.795918
GAAAATTGGGAGCTCTTAGGAGG	0.5	4MMs [2:7:8:11]		chr15:+46030502	15:45738306-45738328		AC068714.1-201	Chromosome 15: 45,705,195-45,931,069+			33133	15.016	40	0.816327
GTAAATTTGAGGCTCTTAGATAG	0.2	4MMs [7:10:11:20]		chr7:-37756625	7:37717028-37717050		GPR141-203	Chromosome 7: 37,683,797-37,740,705+			33231	15.0202	41	0.836735
GTAATTATGTTTCTCTTAGGTGG	1.2	3MMs [5:10:12]	BANK1	chr4:-102952905	4:102031753-102031775		BANK1-208	Chromosome 4: 101,981,863-102,030,075+			49890	15.6065	42	0.857143
GAAAATATTTTGCTCTTAGTTGG	0.4	4MMs [2:9:10:20]		chr5:-102673595	5:103337899-103337921		AC010406.1-201	Chromosome 5: 103,408,941-103,412,511-			74612	16.1871	43	0.877551
GTCAATATGTTGTTCTTAGTGAG	0.2	4MMs [3:10:13:20]		chr12:+81858331	12:81464554-81464576		AC079363.1-201	Chromosome 12: 81,545,326-81,546,450-			81874	16.3211	44	0.897959
GGAAAGGTGATGCTCTTAGGGAG	0.5	4MMs [2:6:7:10]		chrX:-83356420	X:84101417-84101439		RPS6KA6-201	Chromosome X: 84,063,976-84,187,907-			86490	16.4002	45	0.918367
GGGAATATTGTGCTCTTAAGCAG	0.3	4MMs [2:3:9:19]		chrX:+143491627	X:144408534-144408556		RRM2P4-201	Chromosome X: 144,309,132-144,309,693+			99424	16.6013	46	0.938776
GTAAATAACATGCTCTTAGAAAG	0.4	4MMs [8:9:10:20]		chr3:+29556575	3:29515086-29515108		RPS12P5-201	Chromosome 3: 29,390,848-29,391,218+			124260	16.923	47	0.959184
GAAATTAGGGTGCTCTTAGATAG	0.7	4MMs [2:5:8:20]		chr5:-58460968	5:59165147-59165169		AC092343.1-201	Chromosome 5: 59,039,761-59,063,503+			125386	16.936	48	0.979592
GTCAATATTGTTCTCTAAGGGGG	0.2	4MMs [3:9:12:17]		chr3:+176012929	3:176295143-176295165		AC117434.1-201	Chromosome 3: 176,113,702-176,114,537-			158485021	27.2398	49	1

## Sheet: miR-155_1
gRNA	PAM
ACCGAAGTCCCATATGCTCC	AGG
Off-targets:
off-target sequence	score	mismatches	UCSC gene	hg19 location	hg38 location		next gene	next gene location (hg38)			off-target distance to TSS	log2 off-target distance to TSS	rank	frequency
ACCTAAGGCACAAATGCTCCGAG	0.5	4MMs [4:8:10:13]		chr1:+245999801	1:245836501-245836523		AC104462.1-201	Chromosome 1: 245,673,732-245,676,478-			-160023	-17.2879	1	0.0204082			Distance from TSS center vs frequency:
ACTGAAATCCCATAAGCTCCTGG	0.5	3MMs [3:7:15]		chr2:-226178971	2:225314259-225314281		NYAP2-202	Chromosome 2: 225,399,710-225,654,018+			-85451	-16.3828	2	0.0408163
CCAGTAGTCCCATATGCTGCAAG	0.5	4MMs [1:3:5:19]		chr8:+36544776	8:36687260-36687282		RNA5SP264-201	Chromosome 8: 36,764,445-36,764,551+			-77163	-16.2356	3	0.0612245
TCCAAAGTCCCACATGCTCAGAG	0.3	4MMs [1:4:13:20]		chr12:-83500899	12:83107125-83107147		AC090680.1-201	Chromosome 12: 83,151,331-83,152,190+			-44206	-15.432	4	0.0816327
ACCAGAGTCCCACATGCACCTGG	0.1	4MMs [4:5:13:18]		chr8:-22786081	8:22928573-22928595		AC037441.2-201	Chromosome 8: 22,895,434-22,897,813-			-30760	-14.9088	5	0.102041
AGGGAAGTCACATATGTTCCCAG	0.6	4MMs [2:3:10:17]		chr15:-90519274	15:89976047-89976069		ZNF710-201	Chromosome 15: 90,001,392-90,082,200+			-25345	-14.6294	6	0.122449
ACGGCAGGCCCATCTGCTCCCAG	0.2	4MMs [3:5:8:14]		chr1:+41967361	1:41501692-41501714		EDN2-201	Chromosome 1: 41,478,775-41,484,671-			-17021	-14.055	7	0.142857
ACAGAACTCTCAGATGCTCCTAG	0.3	4MMs [3:7:10:13]		chr6:+85384331	6:84674615-84674637		TBX18-AS1-211	Chromosome 6: 84,687,712-84,709,503+			-13075	-13.6745	8	0.163265
ACAGAACTCACACATGCTCCCAG	0.3	4MMs [3:7:10:13]	NM_014571	chr1:-40090297	1:39624630-39624652		AL035404.2-201	Chromosome 1: 39,633,416-39,633,903+			-8786	-13.101	9	0.183673
ACCAGAGGCCCATATGCTCATGG	0.7	4MMs [4:5:8:20]	TTLL1l	chr9:-124589907	9:121827633-121827655		AL596244.1-201	Chromosome 9: 121,815,674-121,819,452-			-8181	-12.9981	10	0.204082
AACAAAGTCCCAGATGCTCCCGG	1.6	3MMs [2:4:13]	NM_001276414	chr16:+1417820	16:1367821-1367843		AL031709.1-201	Chromosome 16: 1,358,900-1,361,405-			-6438	-12.6524	11	0.22449
TCCAGAGTCCCATCTGCTCCTAG	0.2	4MMs [1:4:5:14]		chr8:-20126881	8:20269375-20269397		LZTS1-AS1-201	Chromosome 8: 20,275,773-20,290,458+			-6398	-12.6434	12	0.244898
ACTGAACGCCCATACGCTCCTAG	0.3	4MMs [3:7:8:15]		chr15:+65197997	15:64905800-64905822		ANKDD1A-201	Chromosome 15: 64,911,902-64,958,700+			-6080	-12.5699	13	0.265306
ACCCAAGCCCCATCTGCTCCTGG	0.4	3MMs [4:8:14]		chr17:+17573235	17:17669923-17669945		SMCR2_1.1-201	Chromosome 17: 17,675,366-17,675,522+			-5421	-12.4043	14	0.285714
ACCCAACTCACAGATGCTCCAGG	0.3	4MMs [4:7:10:13]		chr11:-19133845	11:19112303-19112325		ZDHHC13-207	Chromosome 11: 19,117,099-19,149,255+			-4796	-12.2276	15	0.306122
GCAGAAGTGCCATCTGCTCCCAG	0.1	4MMs [1:3:9:14]		chr20:-61736245	20:63104898-63104920		HAR1B-201	Chromosome 20: 63,095,493-63,102,319-			-2579	-11.3326	16	0.326531
ACAGAAATCCCAGATGCTGCAGG	0.1	4MMs [3:7:13:19]		chr1:+41934379	1:41468710-41468732		RNA5SP45-201	Chromosome 1: 41,466,937-41,467,028-			-1704	-10.7347	17	0.346939
ACCTAAATCCCTCATGCTCCTGG	0.2	4MMs [4:7:12:13]		chrX:-50904896	X:51162069-51162091		AC239367.3-201	Chromosome X: 51,162,864-51,163,677+			-795	-9.63481	18	0.367347
ACCCGACTCCCTTATGCTCCGGG	0.5	4MMs [4:5:7:12]	NM_002599	chr11:+72295473	11:72584431-72584453		AP005019.1-201	Chromosome 11: 72,584,572-72,587,979+			-119	-6.89482	19	0.387755
CCCCAAGTCCCTTAAGCTCCCAG	0.2	4MMs [1:4:12:15]		chr19:+36136005	19:35645105-35645127		ETV2-206	Chromosome 19: 35,643,666-35,644,682+			1461	10.5127	20	0.408163
ATTCAAGTCCCATCTGCTCCCAG	0.2	4MMs [2:3:4:14]		chr2:-47456504	2:47229370-47229392		AC073283.2-202	Chromosome 2: 47,226,917-47,239,225+			2453	11.2603	21	0.428571
ACTGGAGTTCCATGTGCTCCTAG	0.1	4MMs [3:5:9:14]		chr1:-12897973	1:12838125-12838147		PRAMEF30P-201	Chromosome 1: 12,838,125-12,841,357-			3232	11.6582	22	0.44898
ACCTAAGCCCCATATGCACGGGG	0.1	4MMs [4:8:18:20]		chr22:+46977682	22:46581787-46581809		GRAMD4-204	Chromosome 22: 46,577,129-46,626,899+			4680	12.1923	23	0.469388
CCCGAAGTCTTATAAGCTCCAGG	0.2	4MMs [1:10:11:15]		chr19:-14375173	19:14264366-14264388		AC011509.1-201	Chromosome 19: 14,267,807-14,269,377-			5011	12.2909	24	0.489796
ATCTCAGTCCCATCTGCTCCAGG	0.2	4MMs [2:4:5:14]		chr2:-106370505	2:105754053-105754075		NCK2-202	Chromosome 2: 105,745,731-105,881,534+			8322	13.0227	25	0.510204
GCCAAAGTTCCATATACTCCCAG	0.2	4MMs [1:4:9:16]		chr22:-48321202	22:47925458-47925480		FP325330.3-201	Chromosome 22: 47,916,728-47,926,264+			8730	13.0918	26	0.530612
CCTGAAGTCCCCCATGCTCCAGG	0.3	4MMs [1:3:12:13]		chr10:-73523908	10:71764156-71764178		VSIR-201	Chromosome 10: 71,747,559-71,773,498-			9342	13.1895	27	0.55102
ACCTGAGTCCCATATGCTTTAAG	0.2	4MMs [4:5:19:20]		chr14:-54987535	14:54520822-54520844		CGRRF1-204	Chromosome 14: 54,509,902-54,538,616+			10920	13.4147	28	0.571429
ACCCATAACCCATATGCTCCAGG	0.5	4MMs [4:6:7:8]	CNGB1	chr16:+57989939	16:57956037-57956059		CNGB1-203	Chromosome 16: 57,960,006-57,967,352-			11315	13.4659	29	0.591837
ACTGAAACCCCATATGCTCACAG	0.5	4MMs [3:7:8:20]		chr17:-33323993	17:34996979-34997001		LIG3-208	Chromosome 17: 34,980,640-34,989,540+			16339	13.996	30	0.612245
ACTTATTTCCCATATGCTCCAGG	0.5	4MMs [3:4:6:7]		chr1:-69917784	1:69452106-69452128		LINC01758-201	Chromosome 1: 69,433,255-69,435,409+			18851	14.2024	31	0.632653
ACCGAAGACTCACATGCTTCAGG	0.2	4MMs [8:10:13:19]		chr4:+74149114	4:73283399-73283421		SNORA3.3-201	Chromosome 4: 73,263,960-73,264,084+			19461	14.2483	32	0.653061
ACCTCAGCCCCATCTGCTCCCAG	0.2	4MMs [4:5:8:14]	NM_001033053	chr17:+5487035	17:5583717-5583739		NLRP1-213	Chromosome 17: 5,583,851-5,619,424-			35685	15.123	33	0.673469
ACACAAGTTCCATATCCTCCAGG	0.2	4MMs [3:4:9:16]		chr18:+59524888	18:61857657-61857679		RNF152-201	Chromosome 18: 61,808,063-61,893,759-			36080	15.1389	34	0.693878
ACCAAAGTCACATAGGCTTCCAG	0.1	4MMs [4:10:15:19]		chr14:+88084596	14:87618254-87618276		LINC02330-201	Chromosome 14: 87,634,379-87,655,294-			37040	15.1768	35	0.714286
ACCCAAGTCCCCTGTGCTCCCAG	0.2	3MMs [4:12:14]		chr3:-52150536	3:52116525-52116547		POC1A-201	Chromosome 3: 52,075,253-52,154,412-			37887	15.2094	36	0.734694
AGACAAGTCCCATATTCTCCAGG	0.3	4MMs [2:3:4:16]		chr4:-29165022	4:29163405-29163427		AC109349.1-201	Chromosome 4: 29,118,308-29,202,770+			45097	15.4607	37	0.755102
ACTGGAGTCCCAGATGTTCCCAG	0.2	4MMs [3:5:13:17]	NM_024690	chr19:+8998716	19:8888042-8888064		MBD3L1-201	Chromosome 19: 8,842,593-8,843,340+			45471	15.4727	38	0.77551
ACAGAAGGACCATATGTTCCAAG	0.4	4MMs [3:8:9:17]	NM_001258326	chr22:+32002392	22:31606408-31606430		AL096701.1-201	Chromosome 22: 31,559,483-31,559,939+			46947	15.5187	39	0.795918
ACTGAAGGCCCCTGTGCTCCCAG	0.1	4MMs [3:8:12:14]		chr15:-32271819	15:31979621-31979643		SNORA18.3-201	Chromosome 15: 31,928,303-31,928,434+			51318	15.6472	40	0.816327
ACCTAAATCCAATATGCTCTCAG	0.3	4MMs [4:7:11:20]		chr7:+32044313	7:32004703-32004725		SNX2P2-201	Chromosome 7: 31,941,261-31,941,583+			63464	15.9537	41	0.836735
CCCAAAGTCTCATATGCCCCCAG	0.3	4MMs [1:4:10:18]		chr14:+34579233	14:34110029-34110051		EGLN3-AS1-201	Chromosome 14: 34,040,097-34,059,300+			69954	16.0941	42	0.857143
ACCTAAATCCCTTATGTTCCAAG	0.2	4MMs [4:7:12:17]		chr11:+103190689	11:103319962-103319984		MTCO3P15-201	Chromosome 11: 103,402,013-103,402,586-			82602	16.3339	43	0.877551
ACAGACGTCCCAGATGCTCAAGG	0.2	4MMs [3:6:13:20]		chr20:-60198317	20:61623266-61623288		AL162457.1-201	Chromosome 20: 61,717,506-61,719,748-			96482	16.558	44	0.897959
ACAGAACTCCCATATGCTGTCAG	0.1	4MMs [3:7:19:20]		chr1:-162184589	1:162214804-162214826		AL512785.1-201	Chromosome 1: 162,316,852-162,317,794-			102990	16.6521	45	0.918367
ATGGAAGTGCCATATGCTCAGAG	0.4	4MMs [2:3:9:20]		chr4:-19928164	4:19926546-19926568		AC114728.1-201	Chromosome 4: 19,813,749-19,814,231+			112797	16.7834	46	0.938776
GCCGATGTCCCAGATGATCCTAG	0.1	4MMs [1:6:13:17]		chr4:+28263853	4:28262233-28262255		AC109588.1-201	Chromosome 4: 28,362,279-28,402,701-			140446	17.0997	47	0.959184
AGCAAAGTCCCAAAAGCTCCTGG	0.2	4MMs [2:4:13:15]		chr9:-7104359	9:7104364-7104386		AL513412.1-201	Chromosome 9: 6,902,670-6,978,859+			201694	17.6218	48	0.979592
TGCCAAGTCCAATATGCTCCTAG	0.8	4MMs [1:2:4:11]		chr3:-68459195	3:68410050-68410072		AC096922.1-201	Chromosome 3: 68,192,398-68,192,580+			217652	17.7317	49	1

## Sheet: miR-155_2
gRNA	PAM
CACGTTTTACGAGGGAGAGC	CGG
Off-targets:
off-target sequence	score	mismatches	UCSC gene	hg19 location	hg38 location		next gene	next gene location (hg38)			off-target distance to TSS	log2 off-target distance to TSS	rank	frequency
CATCTATTACAAGGGAGAGCAGG	0.5	4MMs [3:4:6:11]		chr2:-150082013	2:149225504-149225526		FAM8A3P-201	Chromosome 2: 149,320,593-149,321,436+			-95089	-16.537	1	0.0204082			Distance from TSS center vs frequency:
CACAATTTACTACGGAGAGCTGG	0.3	4MMs [4:5:11:13]		chr10:+92135869	10:90376114-90376136		AL391704.3-201	Chromosome 10: 90,462,717-90,467,952+			-86581	-16.4018	2	0.0408163
CAAGTTGTAGAAGGGAGAGCTGG	0.5	4MMs [3:7:10:11]		chr7:+140979346	7:141279548-141279570		CCT4P1-201	Chromosome 7: 141,351,977-141,352,768+			-72407	-16.1438	3	0.0612245
CTCGTTTTAAGTGGGAGTGCAGG	0.1	4MMs [2:10:12:18]		chr1:-199655178	1:199686055-199686077		AL596266.1-201	Chromosome 1: 199,752,491-199,752,890+			-66436	-16.0197	4	0.0816327
CATGTTTTATGAAGGACAGCTGG	0.2	4MMs [3:10:13:17]		chr13:+51156220	13:50582086-50582108		DLEU1-AS1-201	Chromosome 13: 50,520,933-50,527,449-			-54659	-15.7382	5	0.102041
CACTTTTTACTAAGGAAAGCCAG	0.1	4MMs [4:11:13:17]		chr1:-61480273	1:61014606-61014628		NFIA-AS2-203	Chromosome 1: 60,940,239-60,970,776-			-43830	-15.4196	6	0.122449
CACATTGTACAATGGAGAGCAGG	0.2	4MMs [4:7:11:13]		chr6:+148501016	6:148179882-148179904		AL359382.1-201	Chromosome 6: 148,133,809-148,137,404-			-42500	-15.3752	7	0.142857
CATATATTACAAGGGAGAGCTGG	0.5	4MMs [3:4:6:11]		chr2:+67191882	2:66964752-66964774		LINC01628-201	Chromosome 2: 66,921,510-66,922,457-			-42317	-15.3689	8	0.163265
CACATTTAATCAGGGAGAGCAAG	0.7	4MMs [4:8:10:11]		chr11:-101827825	11:101957099-101957121		ANGPTL5-201	Chromosome 11: 101,890,674-101,916,522-			-40577	-15.3084	9	0.183673
CATGTTTTCTGAGGGAGAGAGAG	0.4	4MMs [3:9:10:20]		chr16:+23813628	16:23802309-23802331		PRKCB-202	Chromosome 16: 23,836,001-24,220,611+			-33670	-15.0392	10	0.204082
AAAGTTTTACGAGGCAGGGCTAG	0.1	4MMs [1:3:15:18]		chr7:-104524466	7:104884024-104884046		RN7SL8P-201	Chromosome 7: 104,911,928-104,912,193+			-27904	-14.7682	11	0.22449
CAAGTTTTACCTGGGAGAGGAGG	0.2	4MMs [3:11:12:20]	NM_001109662	chr12:+112632677	12:112194875-112194897		HECTD4-206	Chromosome 12: 112,166,181-112,167,881-			-27016	-14.7215	12	0.244898
CACGTGGTGCAAGGGAGAGCCAG	0.2	4MMs [6:7:9:11]		chr1:+201623680	1:201654554-201654576		AC092800.1-201	Chromosome 1: 201,673,105-201,674,144+			-18529	-14.1775	13	0.265306
CACATCTAACGCGGGAGAGCTGG	0.4	4MMs [4:6:8:12]		chr2:-239862764	2:238941073-238941095		LINC01940-201	Chromosome 2: 238,919,302-238,926,269-			-14804	-13.8537	14	0.285714
CTAGCTTTAGGAGGGAGAGCAAG	1.3	4MMs [2:3:5:10]		chr1:-95331793	1:94866242-94866264		SLC44A3-AS1-213	Chromosome 1: 94,616,406-94,855,421-			-10821	-13.4015	15	0.306122
CACCTTAGACCAGGGAGAGCAAG	0.5	4MMs [4:7:8:11]		chr3:-180291787	3:180574004-180574026		RNU6-486P-201	Chromosome 3: 180,581,057-180,581,163+			-7053	-12.784	16	0.326531
CAAGTTTTACGAGGTAGAGAAGG	0.4	3MMs [3:15:20]		chr3:-169386543	3:169668760-169668782		MECOM-213	Chromosome 3: 169,149,482-169,663,618-			-5142	-12.3281	17	0.346939
CACGTTTCATTAGGGACAGCTGG	0.3	4MMs [8:10:11:17]		chr16:+29300282	16:29288963-29288985		AC025279.1-201	Chromosome 16: 29,291,220-29,372,110+			-2235	-11.1261	18	0.367347
CACCATTTAGTAGGGAGAGCAGG	0.7	4MMs [4:5:10:11]		chr8:+119634657	8:118622420-118622442		SAMD12-202	Chromosome 8: 118,189,459-118,621,945-			-497	-8.9571	19	0.387755
GACGTTTCAAGAGGGGGAGCTAG	0.3	4MMs [1:8:10:16]		chr2:+7865448	2:7725319-7725341		LINC01871-201	Chromosome 2: 7,725,801-7,730,705+			-460	-8.84549	20	0.408163
CCCTTTTTCCGAGGAAGAGCTGG	0.3	4MMs [2:4:9:15]	NM_002145	chr17:-46620472	17:48543115-48543137		HOXB2-202	Chromosome 17: 48,540,894-48,543,146-			31	4.9542	21	0.428571
CAAGTTTCACAAGGGAGAGCAGG	1.5	3MMs [3:8:11]		chr15:+69683600	15:69391263-69391285		AC027237.4-201	Chromosome 15: 69,391,192-69,392,149+			93	6.53916	22	0.44898
CATGTTTTGCGGGGGAGAGAAAG	0.2	4MMs [3:9:12:20]		chr10:-72690365	10:70930613-70930635		AC073176.2-201	Chromosome 10: 70,929,925-70,932,057+			688	9.42626	23	0.469388
CCCGTTATGCGAGGGAGAGTAGG	0.3	4MMs [2:7:9:20]		chr4:+169767642	4:168846493-168846515		AC080188.3-201	Chromosome 4: 168,843,988-168,844,735+			2527	11.3032	24	0.489796
AACCTTTTACTAGGGAGGGCTGG	0.2	4MMs [1:4:11:18]		chr6:-119026651	6:118705493-118705515		CEP85L-202	Chromosome 6: 118,460,781-118,710,075-			4582	12.1618	25	0.510204
CCCGTTGTACGAAGGAGAGGCAG	0.2	4MMs [2:7:13:20]		chr1:+109270821	1:108728201-108728223		AL591719.2-201	Chromosome 1: 108,734,256-108,734,725-			6502	12.6667	26	0.530612
CACTTTTTGCAAGGGAGAGCTAG	0.9	3MMs [4:9:11]		chr8:+80774986	8:79862753-79862775		AC036214.1-201	Chromosome 8: 79,769,372-79,871,737-			8962	13.1296	27	0.55102
CACCTTGTTAGAGGGAGAGCTGG	0.5	4MMs [4:7:9:10]		chr17:-70220455	17:72224319-72224341		SOX9-AS1-217	Chromosome 17: 72,219,946-72,237,203-			12884	13.6533	28	0.571429
CACATTCTAGGTGGGAGAGCTGG	0.4	4MMs [4:7:10:12]		chr18:-7287489	18:7287496-7287518		SNORA48.8-201	Chromosome 18: 7,301,020-7,301,153-			13657	13.7374	29	0.591837
TACGTTTGACGAGTGAGAGGAGG	0.1	4MMs [1:8:14:20]	NM_002185	chr5:+35877656	5:35877556-35877578		AC112204.3-201	Chromosome 5: 35,895,689-35,896,020-			18442	14.1707	30	0.612245
CCCCTTTTCCGAGGAAGAGCTGG	0.3	4MMs [2:4:9:15]		chr11:-124953584	11:125083693-125083715		SLC37A2-201	Chromosome 11: 125,063,336-125,089,235+			20357	14.3132	31	0.632653
CACCTTTTACCAAGGAGAGCTGG	0.6	3MMs [4:11:13]		chrX:-39746353	X:39887104-39887126		RPS11P7-201	Chromosome X: 39,865,424-39,865,888+			21680	14.4041	32	0.653061
CTGGTTTTACCAGGGAGAGCTGG	1.5	3MMs [2:3:11]		chr4:-53382956	4:52516795-52516817		RNU6-1252P-201	Chromosome 4: 52,494,849-52,494,952+			21946	14.4217	33	0.673469
CACAGTTTAAGAGGGAAAGCTGG	0.5	4MMs [4:5:10:17]		chr16:-52998690	16:52964783-52964805		AC007346.1-202	Chromosome 16: 52,942,781-52,943,464+			22002	14.4253	34	0.693878
CACATTTTAGGTGGGAGAGAAGG	0.3	4MMs [4:10:12:20]		chr7:+36245075	7:36205468-36205490		AC007327.1-201	Chromosome 7: 36,228,621-36,228,884-			23394	14.5139	35	0.714286
CCTGTGTTACCAGGGAGAGCGAG	0.5	4MMs [2:3:6:11]		chr1:+96001321	1:95535767-95535789		AL356479.1-203	Chromosome 1: 95,510,340-95,515,464+			25449	14.6353	36	0.734694
CATGTTTAAAGAGGGAGGGCCAG	0.3	4MMs [3:8:10:18]		chr21:+41265785	21:39893862-39893884		PCP4-204	Chromosome 21: 39,867,451-39,929,397+			26433	14.6901	37	0.755102
CAGGTTTTTCCAGGGAGAGCAAG	0.9	3MMs [3:9:11]		chr9:+125063553	9:122301276-122301298		MRRF-208	Chromosome 9: 122,270,864-122,323,461+			30434	14.8934	38	0.77551
CACAAATTAGGAGGGAGAGCTGG	0.8	4MMs [4:5:6:10]		chr11:+116450221	11:116579506-116579528		AP000770.2-201	Chromosome 11: 116,609,995-116,610,094-			30566	14.8996	39	0.795918
AACGTTTTAAAAGGAAGAGCAAG	0.2	4MMs [1:10:11:15]		chr10:+60303704	10:58543946-58543968		BICC1-202	Chromosome 10: 58,513,140-58,831,437+			30828	14.912	40	0.816327
CACTTTTTAAGGGGGAGAGGTAG	0.3	4MMs [4:10:12:20]		chr7:+127154651	7:127514599-127514621		AC000124.1-201	Chromosome 7: 127,476,883-127,485,804+			37738	15.2037	41	0.836735
CATGTTTTACCTGGGAAAGCCAG	0.2	4MMs [3:11:12:17]		chr10:-44496155	10:44000712-44000734		LINC00841-201	Chromosome 10: 43,939,003-43,944,466+			61709	15.9132	42	0.857143
CAAGTTTTATGATGGAGAGTTAG	0.2	4MMs [3:10:13:20]		chr14:-41829395	14:41360197-41360219		AL391516.1-201	Chromosome 14: 41,296,286-41,298,734+			63911	15.9638	43	0.877551
CACCTTTTACCTGGGAGATCGGG	0.1	4MMs [4:11:12:19]		chr6:-12785914	6:12785687-12785709		PHACTR1-204	Chromosome 6: 12,718,310-12,934,000+			67377	16.04	44	0.897959
CACGTTTTCCGAGGGTGATCAGG	0.1	3MMs [9:16:19]		chr11:-133003444	11:133133554-133133576		AP004782.1-201	Chromosome 11: 133,064,697-133,068,129+			68857	16.0713	45	0.918367
AACGTTTTAGCAGGGAGAGTGAG	0.4	4MMs [1:10:11:20]		chr3:-18285701	3:18244214-18244236		AC144521.1-201	Chromosome 3: 18,408,680-18,409,635-			165421	17.3358	46	0.938776
AACATTTTACAAGGCAGAGCGGG	0.2	4MMs [1:4:11:15]		chr13:+109418958	13:108766612-108766634		MYO16-202	Chromosome 13: 108,596,152-109,208,007+			170482	17.3793	47	0.959184
AACTTTTTAATAGGGAGAGCTAG	0.7	4MMs [1:4:10:11]		chr2:+157894676	2:157038166-157038188		CDK7P1-201	Chromosome 2: 157,210,847-157,211,539-			173351	17.4033	48	0.979592
CGCGTTTGACTAGGGGGAGCAGG	0.1	4MMs [2:8:11:16]		chr2:-71924980	2:71697855-71697877		DYSF-201	Chromosome 2: 71,453,722-71,686,768+			244133	17.8973	49	1

## Sheet: bckgr1
guideRNA:	PAM:
AGTGTTGGAGGTGATAACGA	TGG
Off-targets:
off-target sequence	score	mismatches	UCSC gene	hg19 location	hg38 location		next gene	next gene location (hg38)			off-target distance to TSS	log2 off-target distance to TSS	rank	frequency
ATGGGTGGAGGTGATAATGAAAG	0.3	4MMs [2:3:5:18]		chrX:-90185300	X:90930306-90930328		RNU6-555P-201	Chromosome X: 90,597,235-90,597,340-			-332966	-18.345	1	0.02			Distance from TSS center vs frequency:
ACTGTTGAGGGTGATAAAGATGG	0.2	4MMs [2:8:9:18]		chr4:+31011415	4:31009795-31009817		MTCYBP43-201	Chromosome 4: 30,884,443-30,885,182-			-124635	-16.9273	2	0.04
GGTGATGGAGGTGAAAACTACGG	0.1	4MMs [1:5:15:19]	NM_005245	chr4:-187540183	4:186619034-186619056		MTNR1A-201	Chromosome 4: 186,533,655-186,555,567-			-63467	-15.9537	3	0.06
AGTTTTGCAGGAGATAATGAGAG	0.2	4MMs [4:8:12:18]		chr3:-135214134	3:135495297-135495319		AC128689.1-203	Chromosome 3: 135,379,046-135,439,888-			-55409	-15.7578	4	0.08
ATTGTTGCAGATGATAAGGATGG	0.2	4MMs [2:8:11:18]	NM_017639	chr4:-155242197	4:154321050-154321072		AC110775.1-201	Chromosome 4: 154,373,886-154,374,347+			-52836	-15.6892	5	0.1
GTGGTTGGAGGTGATAAGGAAAG	0.3	4MMs [1:2:3:18]		chr9:+124390750	9:121628473-121628495		AL357936.1-201	Chromosome 9: 121,574,891-121,576,214-			-52259	-15.6734	6	0.12
ATTAATGGAGGTGATAAGGAAAG	0.3	4MMs [2:4:5:18]		chrX:-50347737	X:50604742-50604764		RNU6-935P-201	Chromosome X: 50,649,641-50,649,740+			-44899	-15.4544	7	0.14
AGAGATGGAGCTGATAACAAGGG	0.3	4MMs [3:5:11:19]		chr18:+71620055	18:73952822-73952844		AC010947.1-201	Chromosome 18: 73,921,939-73,922,631-			-30213	-14.8829	8	0.16
AGTGCTGTAGTTGATAACCAGAG	0.3	4MMs [5:8:11:19]		chr3:-40404958	3:40363472-40363494		ENTPD3-201	Chromosome 3: 40,387,156-40,428,619+			-23684	-14.5316	9	0.18
AGTGTTGGAGTTCATAACTAAGG	0.2	3MMs [11:13:19]		chr17:-67160466	17:69164330-69164352		ABCA6-206	Chromosome 17: 69,135,230-69,141,888-			-22442	-14.4539	10	0.2
AGTGTTCGAGGTTATAACAAGAG	0.2	3MMs [7:13:19]	NM_001042546	chr1:-47101189	1:46635522-46635544		MKNK1-225	Chromosome 1: 46,576,589-46,616,843-			-18679	-14.1891	11	0.22
AGAGTAGGAGGTCATAACGATAG	0.6	3MMs [3:6:13]		chr5:-24152822	5:24152718-24152740		AC010342.1-201	Chromosome 5: 24,170,370-24,171,246+			-17652	-14.1075	12	0.24
AATTTTGGAAGTGATAAGGATAG	0.3	4MMs [2:4:10:18]		chr3:-65148001	3:65162331-65162353		LINC02040-201	Chromosome 3: 65,174,958-65,193,499+			-12627	-13.6242	13	0.26
ATTCTAGGAGGTGAGAACGAAAG	0.2	4MMs [2:4:6:15]		chr11:+118830008	11:118959300-118959322		Y_RNA.607-201	Chromosome 11: 118,970,498-118,970,595+			-11176	-13.4481	14	0.28
AGTGATGTTGATGATAACGATGG	0.5	4MMs [5:8:9:11]		chr7:+90960707	7:91331394-91331416		NIPA2P1-201	Chromosome 7: 91,320,128-91,321,103-			-10291	-13.3291	15	0.3
AGTGTTGTAAATAATAACGAAGG	0.3	4MMs [8:10:11:13]		chr18:+65601840	18:67934605-67934627		AC100844.1-201	Chromosome 18: 67,940,949-67,956,426+			-6322	-12.6262	16	0.32
ACTGTGGGAGGTGATAACTACAG	0.7	3MMs [2:6:19]		chr17:+26829188	17:28502172-28502194		FOXN1-202	Chromosome 17: 28,506,243-28,524,731+			-4049	-11.9833	17	0.34
GGTGTTGGAGGCGATAAGGAGAG	0.3	3MMs [1:12:18]		chr2:-171677587	2:170821082-170821104		AC007405.2-203	Chromosome 2: 170,816,405-170,818,037-			-3045	-11.5722	18	0.36
CGTGGTGGAGGTGAGAACCATGG	0.1	4MMs [1:5:15:19]	NM_001024807	chr19:+36370108	19:35879208-35879230		RN7SL402P-201	Chromosome 19: 35,881,890-35,882,153+			-2660	-11.3772	19	0.38
AATGTTTGATGTGATATCGAGAG	0.4	4MMs [2:7:10:17]		chr13:-21321918	13:20747784-20747806		RANP8-201	Chromosome 13: 20,747,035-20,748,057-			273	8.09276	20	0.4
AGAGTAGTAGGTGATAATGACAG	0.2	4MMs [3:6:8:18]		chr14:+100540591	14:100074256-100074278		AL157912.1-201	Chromosome 14: 100,052,803-100,074,878-			600	9.22882	21	0.42
CCTGTGGGAGGTCATAACGATGG	0.4	4MMs [1:2:6:13]		chr16:-21951147	16:21939831-21939853		AC092375.1-201	Chromosome 16: 21,938,865-21,944,958+			966	9.91588	22	0.44
AGTTTTGCAGTTGACAACGAAAG	0.2	4MMs [4:8:11:15]		chr20:+61570540	20:62939190-62939212		GID8-202	Chromosome 20: 62,938,153-62,938,824+			1059	10.0485	23	0.46
AGTGATGAAGGTGAAAGCGATGG	0.2	4MMs [5:8:15:17]		chr13:-88031183	13:87378933-87378955		LIN28AP2-201	Chromosome 13: 87,379,472-87,380,258-			1325	10.3718	24	0.48
AGTGAGGGATGTGATAAAGAAAG	0.2	4MMs [5:6:10:18]		chr3:+32551947	3:32510457-32510479		AC104306.1-201	Chromosome 3: 32,507,955-32,508,325+			2524	11.3015	25	0.5
ATTGGGGGAGGTGATAAAGACGG	0.2	4MMs [2:5:6:18]		chr14:-100207708	14:99741376-99741398		EML1-211	Chromosome 14: 99,737,749-99,878,552+			3627	11.8246	26	0.52
AGTGTTTTATGTGATAACAAAGG	0.3	4MMs [7:8:10:19]		chr2:-181798408	2:180933686-180933708		AC104076.2-201	Chromosome 2: 180,938,830-180,939,298-			5612	12.4543	27	0.54
AGTATTGAATGTGATTACGAGGG	0.2	4MMs [4:8:10:16]		chr2:+80381601	2:80154477-80154499		AC016716.1-201	Chromosome 2: 80,162,428-80,163,135-			8636	13.0761	28	0.56
AGTTCTGCAGGTGATGACGAGGG	0.3	4MMs [4:5:8:16]		chr22:-17614478	22:17133593-17133615		LINC01664-202	Chromosome 22: 17,121,595-17,132,104+			11998	13.5505	29	0.58
ATTCCTGGAGGTGATAACTAAAG	0.5	4MMs [2:4:5:19]		chr8:-53119532	8:52206977-52206999		AC021915.1-201	Chromosome 8: 52,194,362-52,199,580+			12615	13.6229	30	0.6
GGTGTTGGAAGGGATAACAAAAG	0.2	4MMs [1:10:12:19]		chr11:-45289435	11:45267889-45267911		AC103681.1-202	Chromosome 11: 45,253,982-45,254,649+			13907	13.7635	31	0.62
AGTGTGGGGGGTGATAATGAGAG	0.2	3MMs [6:9:18]		chr11:-109494358	11:109623637-109623659		AP003102.1-201	Chromosome 11: 109,637,468-109,638,128-			14491	13.8229	32	0.64
AGGATTGTAGGTGATAAAGATGG	0.3	4MMs [3:4:8:18]		chr10:-20066251	10:19777327-19777349		RNU6-1212P-201	Chromosome 10: 19,792,998-19,793,101-			15774	13.9453	33	0.66
AGTGTAGAAAGTGATAACGTGGG	0.4	4MMs [6:8:10:20]		chr20:+5124949	20:5144305-5144327		CDS2-206	Chromosome 20: 5,127,048-5,175,652+			17279	14.0767	34	0.68
AGTGACAGAGGTGATAACTAAGG	0.2	4MMs [5:6:7:19]		chr14:+35073759	14:34604555-34604577		SNX6-201	Chromosome 14: 34,562,409-34,630,183-			25606	14.6442	35	0.7
AGTAGTGGTGGTGATGACGACAG	0.2	4MMs [4:5:9:16]		chr1:+50543859	1:50078189-50078211		ELAVL4-207	Chromosome 1: 50,048,014-50,201,868+			30197	14.8821	36	0.72
AGTGTTGATGGTGATAAAGAAGG	0.3	3MMs [8:9:18]		chr3:+146682779	3:146964994-146965016		RNU6-505P-201	Chromosome 3: 146,996,607-146,996,713-			31697	14.9521	37	0.74
ATTGATGGAGGTGATAAGGAAAG	0.7	3MMs [2:5:18]		chr2:-217898741	2:217034023-217034045		AC007749.1-201	Chromosome 2: 216,995,906-216,996,490+			38117	15.2181	38	0.76
TGTGTTGGAGGTGACAAGGATAG	0.2	3MMs [1:15:18]		chr8:-66334548	8:65422318-65422340		PPIAP86-201	Chromosome 8: 65,377,592-65,378,111+			44726	15.4488	39	0.78
GGTGTTGGTGGTAATAACGATGG	0.7	3MMs [1:9:13]		chr1:-181263541	1:181294410-181294432		LINC01699-201	Chromosome 1: 181,236,388-181,238,604+			58022	15.8243	40	0.8
GGTGTTACAGGAGATAACGAGGG	0.5	4MMs [1:7:8:12]		chr20:-51414291	20:52797757-52797779		AL121902.1-201	Chromosome 20: 52,858,338-52,862,855-			65098	15.9903	41	0.82
AATGTTGGTCGTGATAACCACAG	0.3	4MMs [2:9:10:19]		chr16:-54886281	16:54852374-54852396		CRNDE-201	Chromosome 16: 54,918,863-54,928,551-			76177	16.2171	42	0.84
TCTGTTGCAGGTGATAACGCAGG	0.7	4MMs [1:2:8:20]	NM_001112724	chr5:-146703516	5:147323958-147323980		STK32A-203	Chromosome 5: 147,235,125-147,384,678+			88833	16.4388	43	0.86
ACTGGTGGAGGTGATAACCCTGG	0.2	4MMs [2:5:19:20]		chr21:-39972961	21:38601042-38601064		SNRPGP13-201	Chromosome 21: 38,502,445-38,502,621+			98597	16.5893	44	0.88
ACTGATAGAGGTGATAACTAGAG	0.4	4MMs [2:5:7:19]		chr2:-151577927	2:150721418-150721440		AC104777.1-201	Chromosome 2: 150,612,381-150,635,116+			109037	16.7345	45	0.9
GGTATTGGAAGTAATAACGAAAG	0.5	4MMs [1:4:10:13]		chr11:-79813649	11:80102610-80102632		AP001284.1-201	Chromosome 11: 79,987,513-79,989,630+			115097	16.8125	46	0.92
AGTGGTGTAGGAGAAAACGAAGG	0.2	4MMs [5:8:12:15]		chr3:-80615705	3:80566560-80566582		AC108740.1-201	Chromosome 3: 80,442,081-80,442,305+			124479	16.9255	47	0.94
GATGTAGGAGGTGATAAAGACAG	0.2	4MMs [1:2:6:18]		chr8:+10040753	8:10183245-10183267		MSRA-205	Chromosome 8: 10,054,501-10,337,823+			128766	16.9744	48	0.96
AGAGTAGGAAGTGATGACGAAGG	0.1	4MMs [3:6:10:16]		chr1:-80248114	1:79782434-79782456		ADH5P2-201	Chromosome 1: 79,521,080-79,522,203+			261354	17.9956	49	0.98
ATGGGTGGAGGTGATAATGAAAG	0.3	4MMs [2:3:5:18]		chrY:-4374764	Y:4506728-4506750		SERBP1P2-201	Chromosome Y: 4,801,685-4,802,848-			296120	18.1758	50	1

## Sheet: bckgr2
GuideRNA:	PAM:
TCTTGTAGTTTGATACCTCC	AGG
Off-targets:
off-target sequence	score	mismatches	UCSC gene	hg19 location	hg38 location		next gene	next gene location (hg38)			off-target distance to TSS	log2 off-target distance to TSS	rank	frequency
TCTTCTGGTTTTATACCTTCAGG	0.2	4MMs [5:7:12:19]		chr2:+142393465	2:141635898-141635920		AC068287.1-201	Chromosome 2: 141,208,082-141,208,376-			-427544	-18.7057	1	0.02			Distance from TSS center vs frequency:
TGTTGTACTTTCATACCTCTGGG	0.3	4MMs [2:8:12:20]		chr4:-141855853	4:140934704-140934726		Y_RNA.610-201	Chromosome 4: 140,779,039-140,779,141-			-155563	-17.2471	2	0.04
TTTTGTACTTTCATACCCCCGAG	0.2	4MMs [2:8:12:18]		chr6:-103048288	6:102600418-102600440		AL357139.1-201	Chromosome 6: 102,453,367-102,453,792-			-146626	-17.1618	3	0.06
ACATGTAGTTGGATAACTCCAAG	0.1	4MMs [1:3:11:16]		chr1:-176717339	1:176748208-176748230		PTP4A1P7-201	Chromosome 1: 176,616,273-176,616,786-			-131422	-17.0038	4	0.08
TCCAGTAGTTTAATACCACCAGG	0.2	4MMs [3:4:12:18]		chr7:+78210721	7:78581406-78581428		MAGI2-235	Chromosome 7: 78,072,558-78,490,029-			-91399	-16.4799	5	0.1
TCTTCTGGTCTGATTCCTCCTGG	0.2	4MMs [5:7:10:15]		chr10:-63349091	10:61589338-61589360		CABCOCO1-201	Chromosome 10: 61,662,961-61,766,766+			-73623	-16.1679	6	0.12
TTTTGAAGTTTGATACTTGCCAG	0.1	4MMs [2:6:17:19]		chr15:-37031849	15:36739653-36739675		AC013640.1-201	Chromosome 15: 36,641,186-36,669,097-			-70556	-16.1065	7	0.14
TCTTATAGGTTGTTACCTGCAAG	0.1	4MMs [5:9:13:19]		chr2:+223664074	2:222799357-222799379		ACSL3-204	Chromosome 2: 222,861,563-222,909,036+			-62184	-15.9243	8	0.16
TCTTCTTGTTTAATACCTCTGAG	0.2	4MMs [5:7:12:20]		chr9:-113539752	9:110777477-110777499		AL513328.1-201	Chromosome 9: 110,727,456-110,727,679-			-49798	-15.6038	9	0.18
TCTTGTAGTGAGATACCTGCTAG	0.4	3MMs [10:11:19]		chr3:+158104309	3:158386522-158386544		AC074276.2-201	Chromosome 3: 158,336,430-158,336,777-			-49767	-15.6029	10	0.2
TTTTATATTTTGATATCTCCGAG	0.3	4MMs [2:5:8:16]		chr8:+10447647	8:10590139-10590161		PRSS51-202	Chromosome 8: 10,482,878-10,547,585-			-42576	-15.3778	11	0.22
TATTGTTGTTTTATACATCCAAG	0.2	4MMs [2:7:12:17]		chr1:-193605713	1:193636588-193636610		AL357793.1-201	Chromosome 1: 193,678,894-193,727,035+			-42306	-15.3686	12	0.24
GCATGTTGTTTTATACCTCCCGG	0.5	4MMs [1:3:7:12]		chr20:-16245563	20:16264923-16264945		PPIAP17-201	Chromosome 20: 16,223,750-16,224,535-			-40388	-15.3016	13	0.26
TCTTCTGTTTTGAGACCTCCAGG	0.1	4MMs [5:7:8:14]		chrX:-149700944	X:150532495-150532517		MTM1-203	Chromosome X: 150,568,619-150,673,322+			-36124	-15.1407	14	0.28
TCTTTTTTTTTGATACCTCATAG	0.5	4MMs [5:7:8:20]		chr5:-22985426	5:22985322-22985344		AC010445.1-201	Chromosome 5: 23,013,048-23,014,527+			-27826	-14.7641	15	0.3
TCTTTCAGTCTCATACCTCCTGG	0.4	4MMs [5:6:10:12]		chr5:-168393438	5:168966438-168966460		AC011389.2-201	Chromosome 5: 168,993,000-168,995,677+			-26562	-14.6971	16	0.32
TCTTGTAATTCGCTACTTCCAGG	0.1	4MMs [8:11:13:17]		chr4:-41060273	4:41058261-41058283		RNU6-836P-201	Chromosome 4: 41,084,607-41,084,713+			-26346	-14.6853	17	0.34
TTTTGTACTTTGATACCTAGTAG	0.2	4MMs [2:8:19:20]		chr16:+14218866	16:14125011-14125033		AC130650.2-201	Chromosome 16: 14,150,833-14,153,235+			-25800	-14.6551	18	0.36
CCTTGAAGTTTCATACCTCTGGG	0.2	4MMs [1:6:12:20]		chr17:-20172203	17:20268895-20268917		RNU6-1057P-201	Chromosome 17: 20,290,257-20,290,358+			-21362	-14.3828	19	0.38
TCTTGTAATGTGCTACCTTCAAG	0.2	4MMs [8:10:13:19]		chr1:-226880807	1:226693111-226693133		ITPKB-IT1-201	Chromosome 1: 226,656,680-226,675,067-			-18044	-14.1392	20	0.4
TTTTGAAGTTTGCTACTTCCCAG	0.1	4MMs [2:6:13:17]		chr4:-5476301	4:5474579-5474601		RN7SKP275-201	Chromosome 4: 5,458,581-5,458,881-			-15698	-13.9383	21	0.42
TATTCTAGATTGATAACTCCTAG	0.2	4MMs [2:5:9:16]		chr1:+187052058	1:187082928-187082950		LINC01036-201	Chromosome 1: 187,092,842-187,360,323+			-9892	-13.272	22	0.44
TTTTCTTGTTTGAGACCTCCAGG	0.2	4MMs [2:5:7:14]		chr16:-17913731	16:17819879-17819901		AC025277.1-201	Chromosome 16: 17,825,252-17,826,906+			-5373	-12.3915	23	0.46
TATTTTGGTTTGATACCTCTCAG	0.5	4MMs [2:5:7:20]		chr1:-207827772	1:207654432-207654454		CDCA4P3-201	Chromosome 1: 207,658,454-207,659,142+			-4022	-11.9737	24	0.48
CCTTGTAGTGTGATTCATCCCAG	0.2	4MMs [1:10:15:17]		chr9:+100675168	9:97912888-97912910		Y_RNA.298-201	Chromosome 9: 97,915,690-97,915,796+			-2780	-11.4409	25	0.5
TATTGTTTTTTGTTACCTCCAGG	0.4	4MMs [2:7:8:13]		chr10:+49512081	10:48304040-48304062		MAPK8-207	Chromosome 10: 48,306,639-48,439,357+			-2577	-11.3315	26	0.52
CCCTGTAGTTTAATACCACCTAG	0.2	4MMs [1:3:12:18]		chr9:-78192392	9:75577481-75577503		AL353780.1-201	Chromosome 9: 75,579,669-75,588,548+			-2188	-11.0954	27	0.54
TCTTGCATTTTCTTACCTCCAGG	0.2	4MMs [6:8:12:13]		chr8:-101445011	8:100432788-100432810		AP003472.2-202	Chromosome 8: 100,428,894-100,430,997-			-1791	-10.8065	28	0.56
TCATTTACTTTGATACCTCAAAG	0.7	4MMs [3:5:8:20]		chr6:+76182893	6:75473179-75473201		RNU1-34P-201	Chromosome 6: 75,473,738-75,473,894-			693	9.43671	29	0.58
TATTGTAATTTCTTACCTCCTGG	0.3	4MMs [2:8:12:13]	NM_181785	chr13:+29291929	13:28717794-28717816		SLC46A3-202	Chromosome 13: 28,700,717-28,718,970-			1154	10.1724	30	0.6
TCTTGTTCTTTGTTACCTCATAG	0.2	4MMs [7:8:13:20]		chr8:-79430593	8:78518363-78518385		PKIA-201	Chromosome 8: 78,516,355-78,603,185+			2008	10.9715	31	0.62
TCCTGAAGTTTAATACTTCCAAG	0.2	4MMs [3:6:12:17]		chr7:-131178049	7:131493295-131493317		AC008264.2-201	Chromosome 7: 131,493,964-131,497,694-			4399	12.103	32	0.64
TCTAGTAGTTTGATACTTACTGG	0.4	3MMs [4:17:19]		chr11:+4624054	11:4602826-4602848		OR52I1-201	Chromosome 11: 4,593,750-4,595,013+			9098	13.1513	33	0.66
TTAAGTAGTTTGAAACCTCCTGG	0.2	4MMs [2:3:4:14]		chr5:-170720219	5:171293220-171293242		AC091980.2-201	Chromosome 5: 171,305,981-171,308,755-			15535	13.9232	34	0.68
TCTTTTAGTCTGGTTCCTCCAAG	0.1	4MMs [5:10:13:15]		chr7:+43542610	7:43503013-43503035		LUARIS-201	Chromosome 7: 43,508,728-43,522,542-			19507	14.2517	35	0.7
TGTTGTTGTTGCATACCTCCTAG	0.3	4MMs [2:7:11:12]		chr11:-26355948	11:26334406-26334428		ANO3-202	Chromosome 11: 26,309,599-26,660,680+			24807	14.5985	36	0.72
TCTTTCAGTTTAGTACCTCCAGG	0.2	4MMs [5:6:12:13]		chr15:+93882989	15:93339762-93339784		AC091078.1-201	Chromosome 15: 93,312,557-93,530,262+			27227	14.7328	37	0.74
ACATGAAGTTTGATACCTGCTAG	0.3	4MMs [1:3:6:19]		chr7:-118493704	7:118853655-118853677		GTF3AP6-201	Chromosome 7: 118,880,103-118,881,288-			27633	14.7541	38	0.76
AATTTTAGTTTGATATCTCCAGG	0.3	4MMs [1:2:5:16]		chr1:-210607034	1:210433695-210433717		AL034351.1-201	Chromosome 1: 210,462,345-210,463,012-			29317	14.8394	39	0.78
TCTGCTATTTTGCTACCTCCTAG	0.6	4MMs [4:5:8:13]		chr3:+185175536	3:185457750-185457772		TMEM41A-207	Chromosome 3: 185,482,671-185,490,027-			32277	14.9782	40	0.8
TCTTTTAATTTTATTCCTCCTAG	0.2	4MMs [5:8:12:15]		chr4:+29550381	4:29548761-29548783		U6.115-201	Chromosome 4: 29,510,635-29,510,737+			38148	15.2193	41	0.82
TCTTATATTATGATACCTCCAAG	2018-03-02	3MMs [5:8:10]		chr7:-119508203	7:119868154-119868176		LINC02476-202	Chromosome 7: 119,704,556-119,907,375-			39221	15.2593	42	0.84
TCCTGTAGGATGATGCCTCCCAG	0.2	4MMs [3:9:10:15]	NR_036614	chr4:+151170710	4:150249560-150249582		RNU7-194P-201	Chromosome 4: 150,209,706-150,209,768+			39876	15.2832	43	0.86
TTATGTAATTTGATACCTACAGG	0.5	4MMs [2:3:8:19]		chr5:-147347242	5:147967684-147967706		EEF1GP2-201	Chromosome 5: 147,922,179-147,923,421+			45505	15.4737	44	0.88
TCTTTTATCTTGATAACTCCTAG	0.2	4MMs [5:8:9:16]	NM_203403	chr9:+12822813	9:12822816-12822838		LURAP1L-202	Chromosome 9: 12,775,668-12,777,578+			47170	15.5256	45	0.9
TATTGTATTATGATACCTCTAAG	0.6	4MMs [2:8:10:20]		chr4:-62135823	4:61270110-61270132		RPL17P19-201	Chromosome 4: 61,211,652-61,212,203+			58458	15.8351	46	0.92
TCATATAGTATGATACTTCCGAG	0.5	4MMs [3:5:10:17]		chr4:+12787078	4:12785456-12785478		AC007370.2-201	Chromosome 4: 12,859,101-12,864,961-			79483	16.2784	47	0.94
GCATTTAGTTTGACACCTCCAAG	0.2	4MMs [1:3:5:14]		chr16:-13143870	16:13050018-13050040		SHISA9-202	Chromosome 16: 12,902,879-12,908,910+			147139	17.1668	48	0.96
TCTAGAAGTTTTATGCCTCCAGG	0.1	4MMs [4:6:12:15]		chr14:-82543086	14:82076747-82076769		EIF3LP1-201	Chromosome 14: 81,916,231-81,917,888+			160516	17.2924	49	0.98
TCCTGTACTTTGATACATCCTGG	2018-02-01	3MMs [3:8:17]		chr7:-52711375	7:52643684-52643706		SGO1P2-201	Chromosome 7: 52,891,837-52,897,807-			254123	17.9552	50	1

## Sheet: bckgr3
GuideRNA:	PAM:
TAGCTGTTCGATCCTAGACC	AGG
Off-targets:
off-target sequence	score	mismatches	UCSC gene	hg19 location	hg38 location		next gene	next gene location (hg38)			off-target distance to TSS	log2 off-target distance to TSS	rank	frequency
CAGCTTTTCAATCCTAGAGCAGG	0.3	4MMs [1:6:10:19]		chr17:-69412518	17:71416382-71416404		RNU7-155P-201	Chromosome 17: 71,298,156-71,298,218-			-118164	-16.8504	1	0.027027			Distance from TSS center vs frequency:
TAGCTGTTAGACCCTGGGCCTAG	0.0	4MMs [9:12:16:18]		chr10:-111176529	10:109416776-109416798		PHB2P1-201	Chromosome 10: 109,528,119-109,529,008+			-111343	-16.7647	2	0.0540541
GTGCTGATCAATCCTAGACCAAG	0.9	4MMs [1:2:7:10]		chr14:-54760825	14:54294112-54294134		CDKN3-208	Chromosome 14: 54,396,849-54,417,951+			-102737	-16.6486	3	0.0810811
TAGCTGTGGGAGCCTCGACCAGG	0.1	4MMs [8:9:12:16]		chr2:-17865562	2:17684300-17684322		GEN1-201	Chromosome 2: 17,753,858-17,788,941+			-69558	-16.0859	4	0.108108
TAGCTGTTCTTTCCTAGTTCCAG	0.0	4MMs [10:11:18:19]		chr3:-120276369	3:120557527-120557549		NDUFB4-201	Chromosome 3: 120,596,309-120,602,500+			-38782	-15.2431	5	0.135135
TAGCTTGTAGATCCTATACCCAG	0.1	4MMs [6:7:9:17]		chr4:+190764597	4:189843444-189843466		LINC01596-201	Chromosome 4: 189,881,515-189,884,868+			-38049	-15.2156	6	0.162162
AAGCTGTTAAATCCTAGGCCCAG	0.2	4MMs [1:9:10:18]		chr4:+190764633	4:189843480-189843502		LINC01596-201	Chromosome 4: 189,881,515-189,884,868+			-38013	-15.2142	7	0.189189
TAGCTGTTAGCTCTTAGACTTGG	0.0	4MMs [9:11:14:20]		chr14:+51741562	14:51274846-51274868		Y_RNA.297-201	Chromosome 14: 51,253,933-51,254,023-			-20845	-14.3474	8	0.216216
TAGCTGATGGATCACAGACCTAG	0.0	4MMs [7:9:14:15]		chr1:-244061239	1:243897942-243897964		AL591885.1-201	Chromosome 1: 243,917,402-244,047,317+			-19460	-14.2482	9	0.243243
TTGCTGTTCTATCCTAAACTGAG	0.2	4MMs [2:10:17:20]		chr1:-22665478	1:22338990-22339012		PPIAP34-201	Chromosome 1: 22,322,840-22,323,331-			-15659	-13.9347	10	0.27027
TAGCTTTAAGATGCTAGACCCAG	0.2	4MMs [6:8:9:13]		chr4:-9915392	4:9913773-9913795		AC108199.1-201	Chromosome 4: 9,922,814-9,924,146+			-9041	-13.1423	11	0.297297
CAGCTGTTCGAACCCCGACCCAG	0.0	4MMs [1:12:15:16]	NR_003580	chr7:-74613717	7:75198000-75198022		PHBP6-201	Chromosome 7: 75,203,926-75,204,711+			-5926	-12.5328	12	0.324324
CAGCTGTTCGAACCCCGACCCAG	0.0	4MMs [1:12:15:16]	NR_002206	chr7:+72608691	7:73194653-73194675		PHBP5-201	Chromosome 7: 73,187,969-73,188,736-			-5917	-12.5307	13	0.351351
GAGCTTTTCACTCCTAGACCTAG	0.4	4MMs [1:6:10:11]		chr3:-11575680	3:11534211-11534233		AC022001.1-201	Chromosome 3: 11,529,488-11,529,755-			-4456	-12.1215	14	0.378378
TTGCTATTTGATCCTAGAGCAGG	0.2	4MMs [2:6:9:19]		chrX:+133310023	X:134175995-134176017		AC002407.1-201	Chromosome X: 134,168,911-134,174,089-			-1928	-10.9129	15	0.405405
TAGCTGTTCTATAGTAGACATGG	0.0	4MMs [10:13:14:20]		chr18:-65172614	18:67505382-67505404		AC110597.3-202	Chromosome 18: 67,506,589-67,514,030+			-1207	-10.2372	16	0.432432
TAACATTTCGATCCTAGACCGGG	2018-04-01	3MMs [3:5:6]	NM_001893	chr17:+80202551	17:82244677-82244699		AC132872.3-201	Chromosome 17: 82,244,770-82,245,591+			-71	-6.14975	17	0.459459
GAGCTGTAAGATCCAAGACCCAG	0.3	4MMs [1:8:9:15]		chr17:+73028751	17:75032658-75032680		KCTD2-206	Chromosome 17: 75,032,612-75,063,263+			68	6.08746	18	0.486486
TATTTGTTCAAGCCTAGACCTGG	0.6	4MMs [3:4:10:12]		chr8:-74970296	8:74058066-74058088		AC087672.1-201	Chromosome 8: 74,055,882-74,056,647+			2184	11.0928	19	0.513514
TATCTGTACTATCCTACACCAGG	0.5	4MMs [3:8:10:17]		chr2:+21867291	2:21644421-21644443		AC009411.1-201	Chromosome 2: 21,638,431-21,649,502-			5059	12.3046	20	0.540541
TAACTGTTCTCTCCTAGGCCTGG	0.2	4MMs [3:10:11:18]		chr12:+57819191	12:57425410-57425432		R3HDM2-208	Chromosome 12: 57,310,340-57,430,790-			5358	12.3875	21	0.567568
AAGCTGTTCTTTCCTAGAGCTGG	0.3	4MMs [1:10:11:19]		chr2:+42153976	2:41926838-41926860		LINC01914-202	Chromosome 2: 41,931,619-41,933,723-			6863	12.7446	22	0.594595
TAGGTGTTGGATCCCAGAACAAG	0.1	4MMs [4:9:15:19]	NM_031480	chr6:+7401186	6:7400955-7400977		RIOK1-203	Chromosome 6: 7,389,793-7,402,848+			11184	13.4491	23	0.621622
TAGCTGTTCAAACATAGAGCAAG	0.0	4MMs [10:12:14:19]	NM_004933	chr16:-89249931	16:89183528-89183550		DH15-201	Chromosome 16: 89,171,767-89,195,492+			11761	13.5217	24	0.648649
TTGTTGTTCGATCCCAGTCCCAG	0.1	4MMs [2:4:15:18]	NM_002737	chr17:-64684460	17:66688347-66688369		AC006947.1-201	Chromosome 17: 66,676,372-66,677,404+			11975	13.5477	25	0.675676
TAGCTATTTGATCCTTGTCCAGG	0.0	4MMs [6:9:16:18]		chr3:-154565619	3:154847835-154847857		AC073359.2-201	Chromosome 3: 154,827,016-154,861,017-			13182	13.6863	26	0.702703
TAGCTGTTCCTTTCTACACCTAG	0.1	4MMs [10:11:13:17]		chr13:+98899503	13:98247251-98247273		AL445223.1-201	Chromosome 13: 98,233,650-98,234,700+			13623	13.7338	27	0.72973
TAGCTGATGGACCCTAGATCCAG	0.1	4MMs [7:9:12:19]		chr17:-52992372	17:54915016-54915038		TOM1L1-222	Chromosome 17: 54,901,134-54,915,860+			13882	13.7609	28	0.756757
TTGCTGATCCATCCTAGAGCTGG	0.3	4MMs [2:7:10:19]		chr11:-72246331	11:72535292-72535314		ART2P-201	Chromosome 11: 72,519,986-72,521,733+			15306	13.9018	29	0.783784
CAGCTGTTCGAACCCCGACCCAG	0.0	4MMs [1:12:15:16]	NM_033001	chr7:+74162377	7:74748042-74748064		GTF2I-217	Chromosome 7: 74,732,537-74,744,941+			15505	13.9204	30	0.810811
TATCTGTTCCCTTCTAGACCAGG	0.3	4MMs [3:10:11:13]		chr2:-86686319	2:86459201-86459223		KDM3A-206	Chromosome 2: 86,440,647-86,451,123+			18554	14.1794	31	0.837838
GAGCTGTCCGATCCTGGTCCCAG	0.1	4MMs [1:8:16:18]		chr2:+54705303	2:54478168-54478190		SPTBN1-203	Chromosome 2: 54,457,261-54,629,204+			20929	14.3532	32	0.864865
TGGCTGTTGGGTCCTAGCCCCAG	0.1	4MMs [2:9:11:18]		chr2:-121182498	2:120424927-120424949		LINC01101-201	Chromosome 2: 120,464,335-120,466,218-			41291	15.3335	33	0.891892
TGGCTGTTCTATTCTAGACTTGG	0.2	4MMs [2:10:13:20]		chr11:+17961356	11:17939811-17939833		SERGEF-212	Chromosome 11: 17,959,453-18,012,929-			73096	16.1575	34	0.918919
TAGCTGTTGGATCCTTCAGCTGG	0.0	4MMs [9:16:17:19]		chr5:-143265743	5:143886183-143886205		HMHB1-202	Chromosome 5: 143,812,268-143,820,568+			73915	16.1736	35	0.945946
TGCCTGTTTGAACCTAGACCCAG	0.4	4MMs [2:3:9:12]		chr2:+209577706	2:208712984-208713006		AC019185.3-201	Chromosome 2: 208,516,908-208,517,230+			196098	17.5812	36	0.972973
CAGCGGTTCCTTCCTAGACCAGG	0.7	4MMs [1:5:10:11]		chr14:+33865136	14:33395932-33395954		NPAS3-211	Chromosome 14: 32,934,933-33,801,103+			461021	18.8145	37	1

## Sheet: bckgr4
guideRNA:	PAM:
CCATATAATCACTCCGTGGT	AGG
Off-targets:
off-target sequence	score	mismatches	UCSC gene	hg19 location	hg38 location		next gene	next gene location (hg38)			off-target distance to TSS	log2 off-target distance to TSS	rank	frequency
CCATCTAATCAGTCAGTGGGGAG	0.1	4MMs [5:12:15:20]		chr2:-46070696	2:45843562-45843584		U51244.1-201	Chromosome 2: 45,674,701-45,675,476-			-168086	-17.3588	1	0.0204082			Distance from TSS center vs frequency:
GGTTATAATCACTCTGTGGTCAG	0.4	4MMs [1:2:3:15]		chr8:+15016375	8:15158868-15158890		AC103851.1-201	Chromosome 8: 15,325,296-15,325,569+			-166406	-17.3443	2	0.0408163
CCATATAATGAATCTGTGGGGGG	0.1	4MMs [10:12:15:20]		chr20:+15344491	20:15363848-15363870		RNA5SP475-201	Chromosome 20: 15,280,764-15,280,873-			-82997	-16.3408	3	0.0612245
ACATTTCATCACTCAGTGGTGAG	0.3	4MMs [1:5:7:15]	NM_002757	chr15:+68061982	15:67769646-67769668		SKOR1-201	Chromosome 15: 67,819,704-67,834,561+			-50036	-15.6107	4	0.0816327
CCATTTAATCAGTCCCTGATAAG	0.0	4MMs [5:12:16:19]		chr7:+97454525	7:97825215-97825237		AC005326.1-201	Chromosome 7: 97,870,167-97,870,289+			-44930	-15.4554	5	0.102041
CCATATATTTACTCTGTGCTTGG	0.1	4MMs [8:10:15:19]		chr13:-69516791	13:68942664-68942686		ZDHHC20P4-201	Chromosome 13: 68,985,058-68,986,064+			-42394	-15.3716	6	0.122449
CCACACAATTACCCCGTGGTAGG	0.3	4MMs [4:6:10:13]		chr11:-79364931	11:79653892-79653914		AP001978.1-201	Chromosome 11: 79,604,967-79,612,300-			-41592	-15.344	7	0.142857
CCATATACTCCTTCCGTGCTTGG	0.1	4MMs [8:11:12:19]		chr11:-87745589	11:88012426-88012448		AP005436.3-201	Chromosome 11: 88,050,106-88,062,110+			-37680	-15.2015	8	0.163265
ACATATAAAAACTCCGTGGGTGG	0.4	4MMs [1:9:10:20]		chr5:+42502162	5:42502062-42502084		SERBP1P6-201	Chromosome 5: 42,465,400-42,468,868-			-33216	-15.0196	9	0.183673
CCAAATAATTAGTCTGTGGTCAG	0.2	4MMs [4:10:12:15]		chr17:-59433113	17:61355757-61355779		AC005746.1-202	Chromosome 17: 61,383,401-61,384,680+			-27644	-14.7547	10	0.204082
CTATATAACAACTCTGTGGTGGG	0.2	4MMs [2:9:10:15]		chr8:-111595995	8:110583771-110583793		AC025366.1-201	Chromosome 8: 110,609,241-110,632,394+			-25470	-14.6365	11	0.22449
CCCTAAAATCACTCCCTGGTAAG	0.3	3MMs [3:6:16]		chr4:-37057028	4:37055411-37055433		AL136537.1-201	Chromosome 4: 37,078,577-37,125,424+			-23166	-14.4997	12	0.244898
GCATACAGTCACTCTGTGGTTAG	0.3	4MMs [1:6:8:15]		chr9:-84080799	9:81465889-81465911		AL161727.1-201	Chromosome 9: 81,488,308-81,488,837+			-22419	-14.4524	13	0.265306
TCATATAATCACTCCTTGGCAAG	0.3	3MMs [1:16:20]		chr2:-180665968	2:179801246-179801268		AC092642.1-201	Chromosome 2: 179,814,251-179,814,675+			-13005	-13.6668	14	0.285714
CCAGAGAATCAATCCGTGTTTGG	0.1	4MMs [4:6:12:19]		chr22:+38586731	22:38190726-38190748		MAFF-208	Chromosome 22: 38,200,767-38,204,050+			-10019	-13.2905	15	0.306122
CCATGTAATCAATCAGTAGTAAG	0.0	4MMs [5:12:15:18]		chr15:+50566179	15:50273984-50274006		HDC-201	Chromosome 15: 50,241,947-50,266,026-			-7980	-12.9622	16	0.326531
AAATATGATCAATCCGTGGTTGG	0.5	4MMs [1:2:7:12]		chr12:-19654816	12:19501887-19501909		AC091805.1-201	Chromosome 12: 19,508,904-19,509,245+			-7017	-12.7766	17	0.346939
CCACATAATCACACTGTGTTCAG	0.1	4MMs [4:13:15:19]		chr11:-49886884	11:49865337-49865359		AP006587.5-201	Chromosome 11: 49,854,080-49,859,402-			-5935	-12.535	18	0.367347
CCAAATAATCTCTCTGTGGTTGG	0.4	3MMs [4:11:15]		chr11:-33272863	11:33251322-33251344		HIPK3-204	Chromosome 11: 33,256,672-33,353,568+			-5350	-12.3853	19	0.387755
CCATTCATTCACTCCGAGGTGAG	0.4	4MMs [5:6:8:17]		chr12:+1638073	12:1528909-1528931		LINC00942-201	Chromosome 12: 1,529,891-1,639,709+			-960	-9.90689	20	0.408163
CCCTATAATCCCTTCGTGGAAAG	0.1	4MMs [3:11:14:20]		chr17:-27621734	17:29294721-29294743		NUFIP2-201	Chromosome 17: 29,255,836-29,294,118-			-603	-9.23601	21	0.428571
CCATATTATCCCTCCGGGGAGGG	0.1	4MMs [7:11:17:20]	NM_004136	chr15:-78730643	15:78438306-78438328		IREB2-209	Chromosome 15: 78,438,422-78,462,944+			-116	-6.85798	22	0.44898
CCATTTGATCACTCCCTGGAAAG	0.1	4MMs [5:7:16:20]	NM_000423	chr12:-53044048	12:52650269-52650291		KRT2-202	Chromosome 12: 52,648,208-52,650,672-			403	8.65464	23	0.469388
CTATATAGTCACTCTGTGGGAGG	0.2	4MMs [2:8:15:20]		chr17:-46505199	17:48427842-48427864		SKAP1-207	Chromosome 17: 48,133,445-48,430,275-			2433	11.2485	24	0.489796
CCATATAGTAACTCCTTGGATAG	0.1	4MMs [8:10:16:20]	NM_207361	chr13:-39264622	13:38690490-38690512		FREM2-201	Chromosome 13: 38,687,129-38,887,131+			3361	11.7147	25	0.510204
CCATGCAATCACTGAGTGGTAAG	0.0	4MMs [5:6:14:15]		chr2:+11882038	2:11741914-11741936		AC012456.2-201	Chromosome 2: 11,740,997-11,745,301-			3365	11.7164	26	0.530612
TGATATAATCACTCTGTGTTGGG	0.1	4MMs [1:2:15:19]		chr1:+55348791	1:54883120-54883142		DHCR24-203	Chromosome 1: 54,849,635-54,887,176-			4034	11.978	27	0.55102
CCATAGAATAACTCCGGGCTCAG	0.1	4MMs [6:10:17:19]	NM_015567	chr13:-88329052	13:87676802-87676824		SLITRK5-201	Chromosome 13: 87,672,615-87,696,272+			4187	12.0317	28	0.571429
CAATATATTCACTCCTTGTTGAG	0.1	4MMs [2:8:16:19]		chr2:+202632727	2:201768006-201768028		AC007279.1-201	Chromosome 2: 201,762,737-201,763,573+			5291	12.3693	29	0.591837
CCATATAAACAATCTGTGTTGAG	0.0	4MMs [9:12:15:19]		chr7:-129131465	7:129491629-129491651		RNU1-72P-201	Chromosome 7: 129,484,504-129,484,656+			7125	12.7987	30	0.612245
CTCTATAATCACTGTGTGGTGAG	0.1	4MMs [2:3:14:15]		chr6:+143676400	6:143355265-143355287		AL136116.3-201	Chromosome 6: 143,342,246-143,343,383+			13041	13.6708	31	0.632653
CCAAACAATCTCTTCGTGGTGAG	0.1	4MMs [4:6:11:14]	NM_001256579	chr21:-16015313	21:14642997-14643019		AF130351.1-202	Chromosome 21: 14,593,720-14,658,821-			15824	13.9498	32	0.653061
ACATATAATCACCCCTGGGTTGG	0.0	4MMs [1:13:16:17]		chr15:+79619798	15:79327458-79327480		TMED3-202	Chromosome 15: 79,311,145-79,427,432+			16335	13.9957	33	0.673469
CCATATCACCACTCTGTGTTTAG	0.1	4MMs [7:9:15:19]		chr8:-141618202	8:140608108-140608130		AC067931.3-201	Chromosome 8: 140,591,684-140,593,201+			16424	14.0035	34	0.693878
CCCTAGAATCACTTGGTGGTCAG	0.0	4MMs [3:6:14:15]		chrX:-5111386	X:5193350-5193372		MTCYBP12-201	Chromosome X: 5,169,512-5,170,645+			23838	14.541	35	0.714286
CCACATAATCACACTGTGTTCAG	0.1	4MMs [4:13:15:19]		chr11:-89398189	11:89665026-89665048		FOLH1B-202	Chromosome 11: 89,639,227-89,698,599+			25799	14.655	36	0.734694
CCACATAATCACACTGTGTTCAG	0.1	4MMs [4:13:15:19]		chr11:+49201898	11:49180348-49180370		FOLH1-201	Chromosome 11: 49,146,635-49,208,670-			28300	14.7885	37	0.755102
CCATCTAAGTACTCCGTGCTTAG	0.3	4MMs [5:9:10:19]		chr11:-82575163	11:82864126-82864148		AP001646.1-201	Chromosome 11: 82,835,509-82,837,222+			28617	14.8046	38	0.77551
CCATATCTTCACTCCCTGGCCAG	0.1	4MMs [7:8:16:20]		chr20:-33508681	20:34920883-34920905		GSS-202	Chromosome 20: 34,928,828-34,951,852-			30969	14.9185	39	0.795918
CCATGCAATGCCTCCGTGGTAGG	0.4	4MMs [5:6:10:11]		chr2:-229441905	2:228577194-228577216		LINC01807-201	Chromosome 2: 228,483,261-228,611,395-			34201	15.0618	40	0.816327
CCATCTAATCACCCCTGGGTCAG	0.0	4MMs [5:13:16:17]		chr13:-103299003	13:102646658-102646680		METTL21C-201	Chromosome 13: 102,685,744-102,694,504-			47846	15.5461	41	0.836735
CCCTAAAATCACACCGAGGTGAG	0.1	4MMs [3:6:13:17]		chr2:-235912474	2:235003835-235003857		SH3BP4-204	Chromosome 2: 234,952,076-235,041,135+			51759	15.6595	42	0.857143
TCCTATAATGATTCCGTGGTAGG	0.7	4MMs [1:3:10:12]		chr2:+23685371	2:23462503-23462525		AC011239.1-201	Chromosome 2: 23,507,043-23,524,344-			61819	15.9158	43	0.877551
CCAAATAACCACTGGGTGGTAAG	0.0	4MMs [4:9:14:15]		chr6:+129957310	6:129636167-129636189		ARHGAP18-201	Chromosome 6: 129,576,132-129,710,225-			74036	16.1759	44	0.897959
CCAGAAAATCACTCAGTGCTGAG	0.1	4MMs [4:6:15:19]		chr7:+70405492	7:70940508-70940530		AC073873.1-201	Chromosome 7: 70,837,738-70,838,013+			102792	16.6494	45	0.918367
CCATCTAATTACTCAGTGATTAG	0.1	4MMs [5:10:15:19]		chr11:-15378510	11:15356969-15356991		snoMBII-202.2-201	Chromosome 11: 15,481,808-15,481,893-			124924	16.9307	46	0.938776
CCAGATAATCATTCTGTGTTAAG	0.1	4MMs [4:12:15:19]		chr21:-21492193	21:20119885-20119907		LINC02573-201	Chromosome 21: 20,256,752-20,258,820-			138935	17.0841	47	0.959184
CCATATATTCATTCCATGGTTGG	0.2	3MMs [8:12:16]		chr2:-15381576	2:15241457-15241479		AC007738.1-201	Chromosome 2: 15,397,435-15,397,782-			156325	17.2542	48	0.979592
GCATATAGTCATTCCATGGTGAG	0.1	4MMs [1:8:12:16]		chr1:+81259113	1:80793430-80793452		LINC01781-202	Chromosome 1: 80,535,755-80,646,788+			257697	17.9753	49	1

[truncated: 2 more sheets: bckgr5, bckgr6]
