# Supplementary material
Source: publisher figshare collection journal article supplement (https://plos.figshare.com/articles/dataset/_/5898772)
Supplement: Supplementary file 1 [file 1 › S1 Table.pdf]

| Oligo ID | Sequence                   | Purpose               |
|----------|----------------------------|-----------------------|
|          | <b>qPCR</b>                |                       |
| OBS-712  | GCTTCGGCAGCACATATACTAAAAT  | hU6 forward           |
| OBS-713  | ATATGGAACGCTTCACGAATTTG    | hU6 reverse           |
| OBS-814  | AGGTGCTACACAGAAGTGGATTCTAG | hMalat 1 forward      |
| OBS-815  | CTTCCCGTACTTCTGTCTTCCAGT   | hMalat 1 reverse      |
| OBS-720  | ATGGAGCAACAAGTGGTGTCTC     | hIL1 $\beta$ forward  |
| OBS-721  | TCAACACGCAGGACAGGTACAG     | hIL1 $\beta$ reverse  |
| OBS-017  | ACTGAGAGTGATTGAGAGTGGAC    | hIL8 forward          |
| OBS-018  | AACCCTCTGCACCCAGTTTTTC     | hIL8 reverse          |
| OBS-733  | AGCAAGCAAGTCTGTGCTGATC     | hCCL4 forward         |
| OBS-744  | TGTGTCTCATGGAGAAGCATCC     | hCCL4 reverse         |
|          | <b>Genomic DNA PCR</b>     |                       |
| OBS-1288 | GGTCAGCCTGAGACCACTTCT      | hMalat 1 forward      |
| OBS-1289 | AACGCTAAGCAATATCTTAGTAACC  | hMalat 1 reverse      |
| OBS-1292 | AGTGACTACATCTGCCTGGAAGC    | hsa-miR-146a forward  |
| OBS-1293 | AAGTAATAGCCATAGTCTTCCAACC  | hsa-miR-146a reverse  |
| OBS-1290 | TAGGCTTGTAGGATAAACTTGCC    | hsa-miR-155 forward   |
| OBS-1291 | TAGATCTGCTGTGTGATGCTGG     | hsa-miR-155 reverse   |
| OBS-1922 | ACATCAACTCTCCGGATGCC       | Malat 1 off1 forward  |
| OBS-1923 | AGAGAGGACACGGCAGTCTG       | Malat 1 off1 reverse  |
| OBS-1952 | ATATACCATCTCTCCTCGTC       | Malat 1 off2 forward  |
| OBS-1953 | ATTGAGCTTTAGTCACTAAC       | Malat 1 off2 reverse  |
| OBS-1938 | AGACAATTAATGGTCAATGAGTGC   | miR-155 off1 forward  |
| OBS-1939 | TATGGTTGTAGGCTAGGCATTCTAAG | miR-155 off1 reverse  |
| OBS-1942 | ATCAATTGACTGCACATATGTGG    | miR-155 off2 forward  |
| OBS-1943 | TCTAATCAGAGCAACTGAAGGAGG   | miR-155 off2 reverse  |
| OBS-1930 | AAGCTTCCACTCTGGCTAAGC      | miR-146a off1 forward |
| OBS-1931 | CTCACACCTAATTTAGATACTGCGAG | miR-146a off1 reverse |
| OBS-1934 | GAATCTCTTAATACATACATGCAGC  | miR-146a off2 forward |
| OBS-1935 | AGTTCCGGTTTCTACTTCCTC      | miR-146a off2 reverse |
|          | <b>Northern blot</b>       |                       |
| OBS-1787 | CTACCTGCACTGTAAGCACTTTG    | hsa-miR-17            |
| OBS-1618 | ACCCCTATCACGATTAGCATTAA    | hsa-miR-155           |
| OBS-1619 | AACCCATGGAATTCACTTCTCA     | hsa-miR-146a          |
|          | <b>Sanger sequencing</b>   |                       |
| OBS-842  | CTGGCCTTTTGCTCACATGT       | pX458_forward         |
| OBS-843  | GTCTGCAGAATTGGCGCAC        | pX458_reverse         |
