# Supplementary material
Source: publisher figshare collection journal article supplement (https://plos.figshare.com/articles/dataset/_/5898772)
Supplement: Supplementary file 1 [file 1 › S2 Fig.pdf]

|             |    | miR-155 |    | miR-146a |    | MALAT1 |  |
|-------------|----|---------|----|----------|----|--------|--|
| Guide #     | 1  | 2       | 1  | 2        | 1  | 2      |  |
| Off-targets | 49 | 49      | 50 | 49       | 48 | 49     |  |
| Genic       | 8  | 3       | 3  | 4        | 3  | 9      |  |

  

|             |    | random |    |    |    |    |  |
|-------------|----|--------|----|----|----|----|--|
| Guide #     | 1  | 2      | 3  | 4  | 5  | 6  |  |
| Off-targets | 50 | 50     | 37 | 49 | 50 | 50 |  |
| Genic       | 5  | 3      | 7  | 6  | 5  | 6  |  |

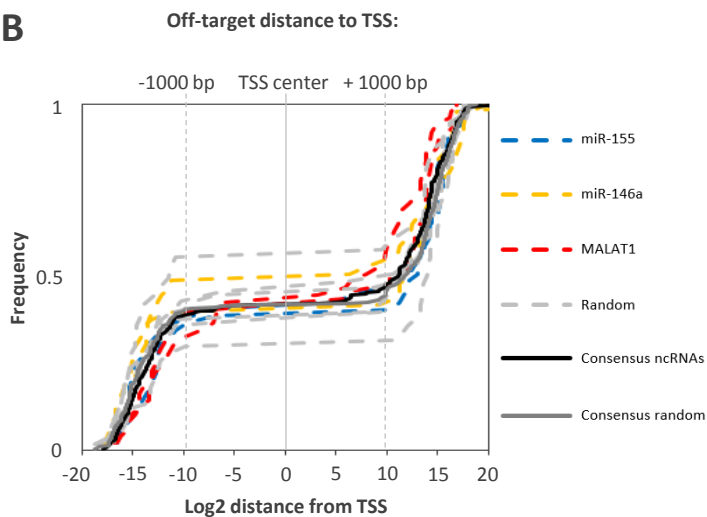

### Off-target Sanger sequencing

Figure 2: Schematic representation of the 3' UTRs of MALAT1, miR-146a, and miR-155. The figure displays the 3' UTR sequences of MALAT1, miR-146a, and miR-155, along with the binding sites for guideRNA1 and guideRNA2. The sequences are shown in a schematic representation, with positions 1 to 60 indicated. The binding sites for guideRNA1 and guideRNA2 are highlighted in red boxes. The sequences are shown in a schematic representation, with positions 1 to 60 indicated. The binding sites for guideRNA1 and guideRNA2 are highlighted in red boxes.
