# Supplementary material
Source: publisher figshare collection journal article supplement (https://plos.figshare.com/articles/dataset/_/5898772)
Supplement: Supplementary file 1 [file 1 › S2 Table.pdf]

| Cell type                        | Monocytes                                    | Monocytes                             | Macrophages                 | Macrophages                                | Dendritic cells             | Dendritic cells              |
|----------------------------------|----------------------------------------------|---------------------------------------|-----------------------------|--------------------------------------------|-----------------------------|------------------------------|
| Dataset description              | Mock, LPS stimulation or gram-pos. infection | Mock, LPS or IFN $\gamma$ stimulation | Mock or gram-pos. infection | Mock, IFN $\gamma$ or PAM3CSK4 stimulation | Mock or gram-pos. infection | Mock, CpG or IMQ stimulation |
| Datasets & SRR accession numbers | SRR1539216                                   | SRR1282180                            | SRR1947529                  | SRR1910733                                 | SRR1725922                  | SRR3229076                   |
|                                  | SRR1539218                                   | SRR1282181                            | SRR1947545                  | SRR1910734                                 | SRR1725926                  | SRR3229077                   |
|                                  | SRR1539219                                   | SRR1282182                            | SRR1947552                  | SRR1910737                                 | SRR1725930                  | SRR3229078                   |
|                                  | SRR1539221                                   | SRR1282195                            | SRR1947567                  | SRR1910738                                 | SRR1725934                  | SRR3229082                   |
|                                  | SRR1539222                                   | SRR1282196                            | SRR1947590                  |                                            | SRR1725938                  | SRR3229083                   |
|                                  | SRR1539224                                   | SRR1282197                            | SRR1947603                  |                                            | SRR17259242                 | SRR3229084                   |
|                                  | SRR1539244                                   |                                       | SRR1947605                  |                                            |                             | SRR3229088                   |
|                                  | SRR1539246                                   |                                       | SRR1947529                  |                                            |                             | SRR3229089                   |
|                                  | SRR1539247                                   |                                       | SRR1947620                  |                                            |                             | SRR3229090                   |
|                                  | SRR1539249                                   |                                       | SRR1947632                  |                                            |                             |                              |
