# Supplementary material
Source: publisher figshare collection journal article supplement (https://plos.figshare.com/articles/dataset/_/5898772)
Supplement: Supplementary file 1 [file 1 › S5 Fig.pdf]

**A**

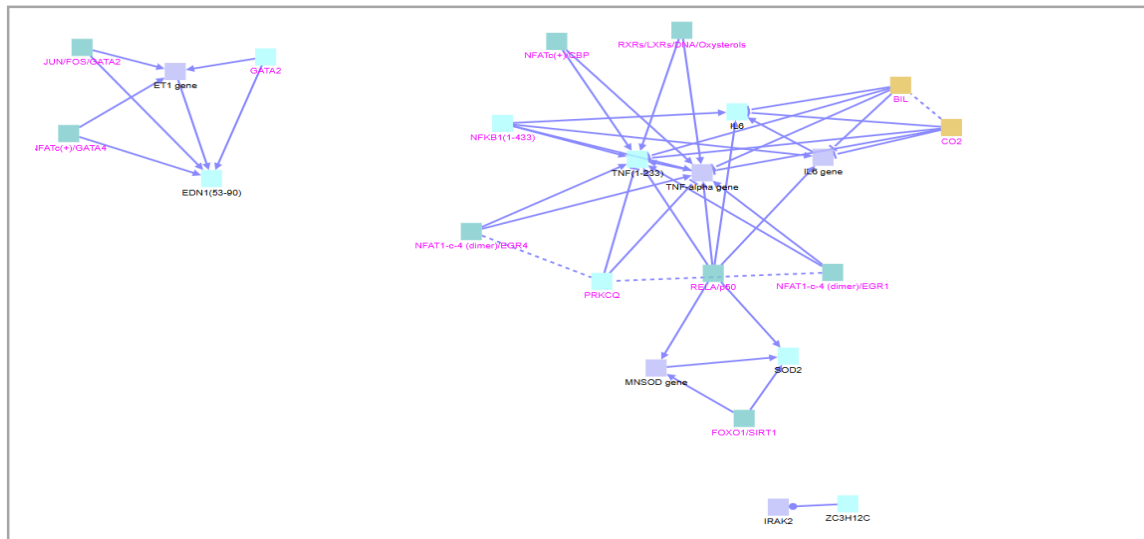

# B

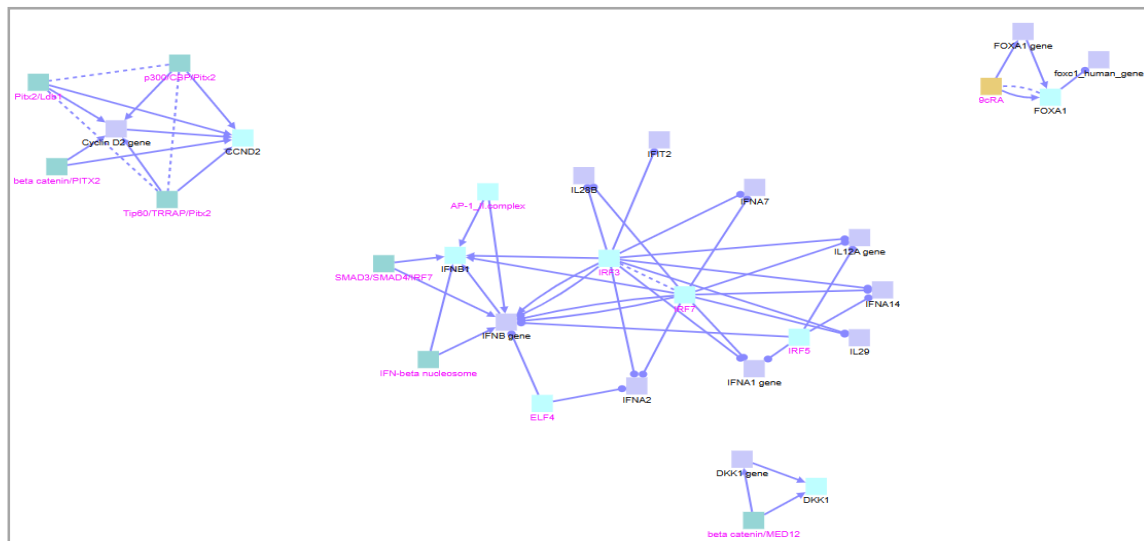

## C

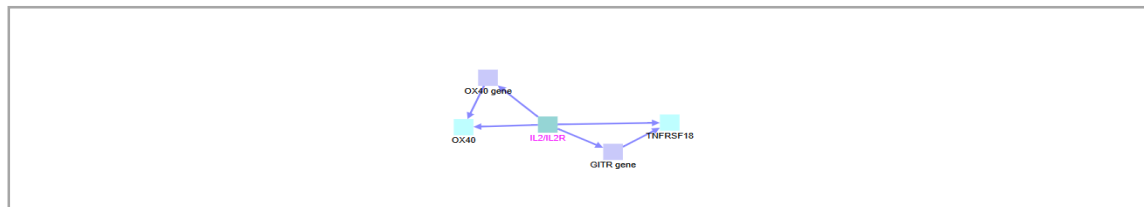

| Physical entity color | Interaction color           | Node label color                                                                                    |
|-----------------------|-----------------------------|-----------------------------------------------------------------------------------------------------|
| gene                  | protein interaction         | <b>black</b> node labels denote seed nodes;<br><b>magenta</b> node labels denote intermediate nodes |
| protein               | genetic interaction         |                                                                                                     |
| protein complex       | biochemical reaction        |                                                                                                     |
| RNA                   | gene regulatory interaction |                                                                                                     |
| compound              | drug-target interaction     |                                                                                                     |
| family / unknown      |                             |                                                                                                     |
