# Supplementary material
Source: publisher figshare collection journal article supplement (https://plos.figshare.com/articles/dataset/_/5898772)
Supplement: Supplementary file 1 [file 1 › S7 Fig.pdf]

pX458 dual guideRNA cassette:

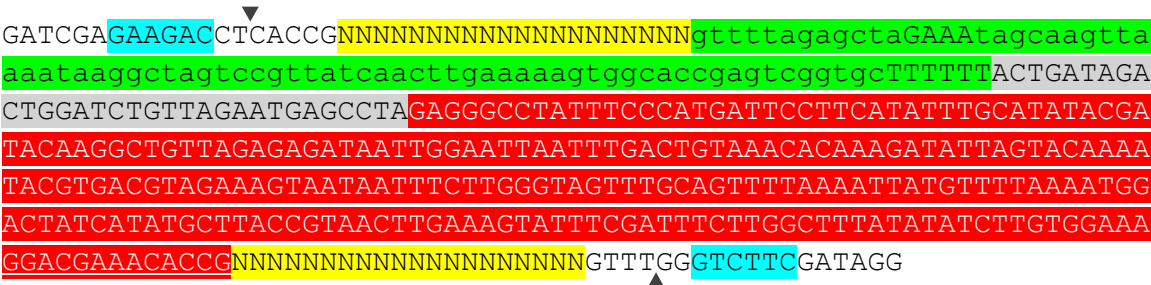

BbsI binding motif      ▲▼ BbsI cut sites      GuideRNA sequence      GuideRNA scaffold

Spacer sequence      Second U6 promoter

GuideRNA sequences used in the present study:

|           |         |                       |
|-----------|---------|-----------------------|
| MIR155HG  | gRNA 1: | GGAGCATATGGGACTTCGGT  |
| MIR155HG  | gRNA 2: | GCTCTCCCTCGTAAAACGTG  |
| MIR146aHG | gRNA 1: | TAGCAGGTAGCCCGAATTAT  |
| MIR146aHG | gRNA 2: | CCTAAGAGCACCATATTTAC  |
| MALAT1    | gRNA 1: | CGTG TAGCTATCAAGGGCCA |
| MALAT1    | gRNA 2: | CGCCCGAGCTGTGCGGTAGG  |
