# Supplementary material
Source: publisher figshare collection journal article supplement (https://plos.figshare.com/articles/dataset/_/5898772)

**A** miR146aHG co-expression network

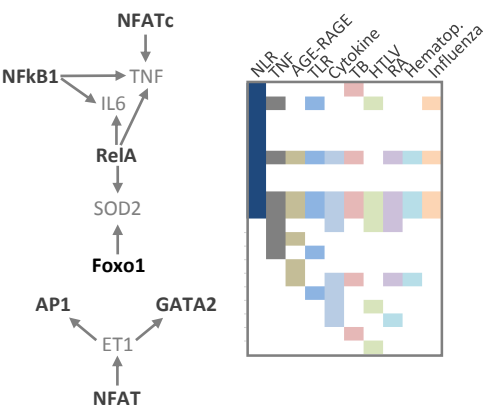

**B** miR155HG co-expression network

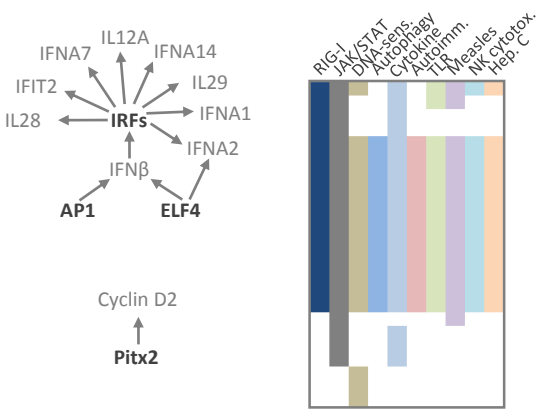

**C** MALAT1 co-expression network

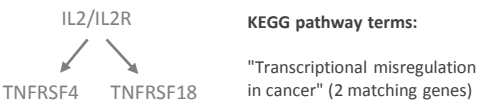

Supplement: Supplementary file [file 1]
