# Supplementary material
Source: publisher figshare collection journal article supplement (https://plos.figshare.com/articles/dataset/_/5898772)

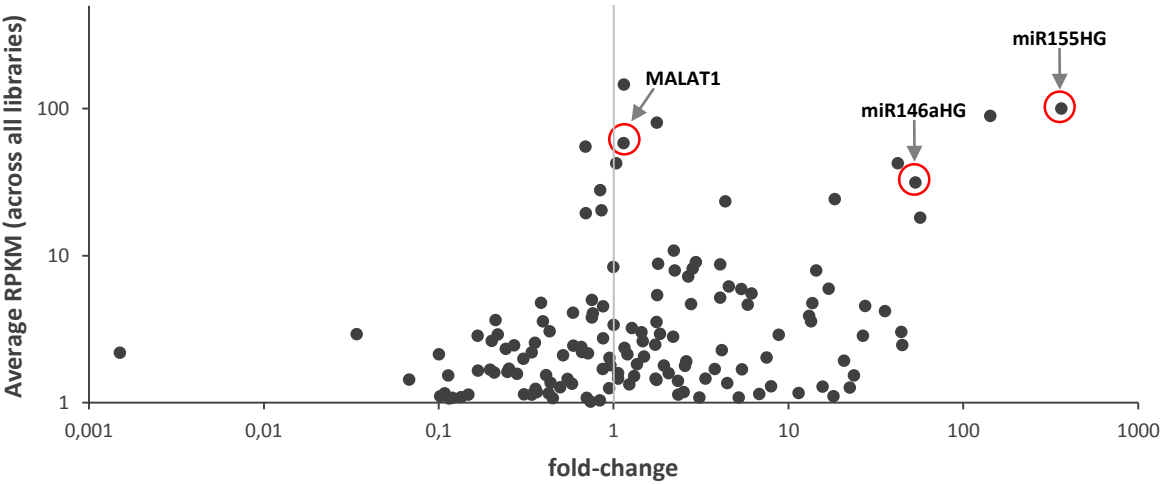

Supplement: Supplementary file 1 [file 1 › S1 Fig.pdf]

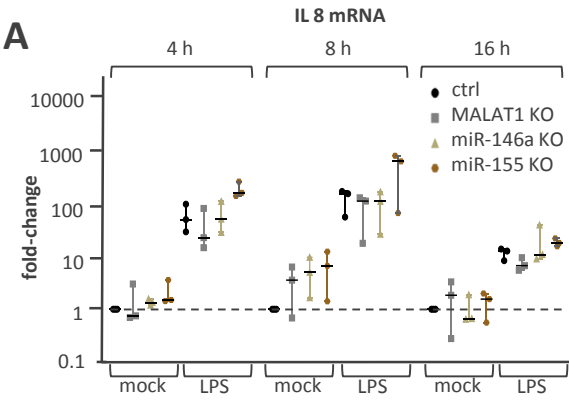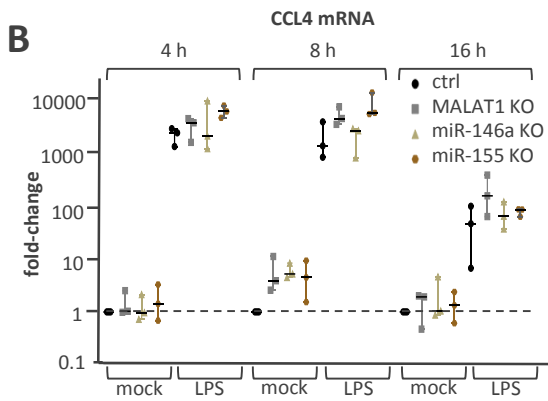

Supplement: Supplementary file 1 [file 1 › S3 Fig.pdf]

**A** miR146aHG co-expression network

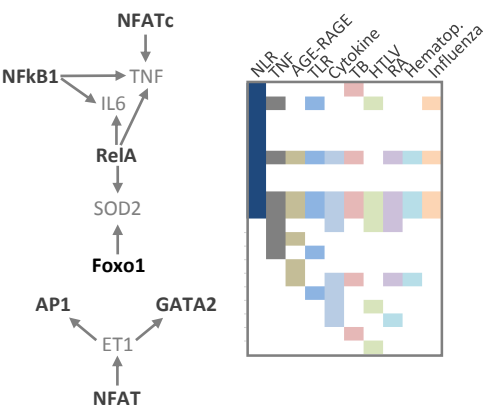

**B** miR155HG co-expression network

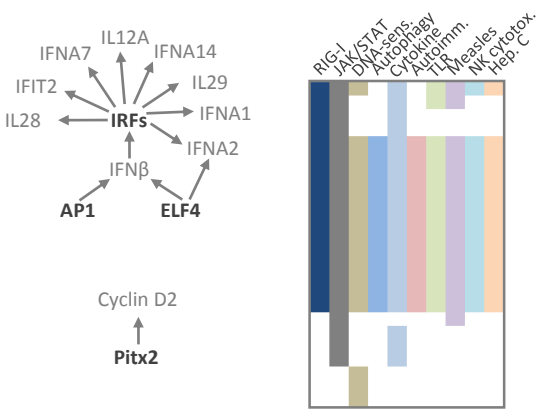

**C** MALAT1 co-expression network

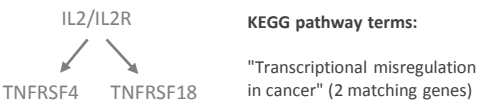

Supplement: Supplementary file 1 [file 1 › S4 Fig.pdf]

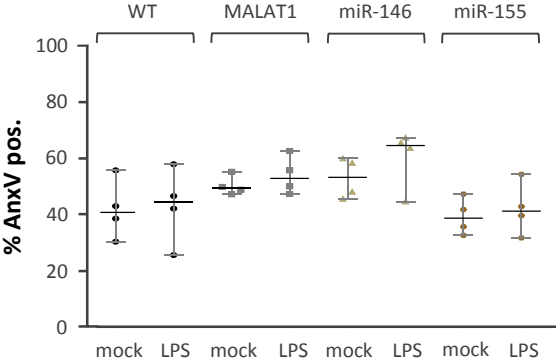

Supplement: Supplementary file 1 [file 1 › S6 Fig.pdf]
